1 Predictive models for secondary epilepsy within 1 year in patients with acute ischemic  
2 stroke: a multicenter retrospective study

3 Jinxin Liu<sup>1,2†</sup>, Haoyue He<sup>1,3†</sup>, Yanglingxi Wang<sup>1</sup>, Jun Du<sup>7</sup>, Kaixin Liang<sup>8</sup>, Jun Xue<sup>9</sup>, Yidan  
4 Liang<sup>1</sup>, Peng Chen<sup>1</sup>, Shanshan Tian<sup>6</sup>, Yongbing Deng<sup>1,4,5</sup>.

5 1 Department of Neurosurgery, Chongqing Emergency Medical Center, Chongqing  
6 University Central Hospital, Chongqing, China

7 2 School of Medicine, Chongqing University, Chongqing, China

8 3 Bioengineering College of Chongqing University, Chongqing, China

9 4 Chongqing Key Laboratory of Emergency Medicine

10 5 Jinfeng Laboratory, Chongqing, China

11 6 Department of Prehospital Emergency, Chongqing University Central Hospital,  
12 Chongqing Emergency Medical Center, Chongqing, China

13 7 Department of Neurosurgery, Chongqing University Qianjiang Hospital, Chongqing,  
14 China

15 8 Department of Neurosurgery, Yubei District Hospital of Traditional Chinese Medicine,  
16 Chongqing, China

17 9 Department of Neurosurgery, Bishan hospital of Chongqing Medical University,  
18 Chongqing, China

19 8 Chongqing Key Laboratory of Emergency Medicine

20

21 †These authors have contributed equally to this work and share first authorship.

22

23 Corresponding author: Yongbing Deng Email: [dyb0913@cqu.edu.cn](mailto:dyb0913@cqu.edu.cn)

24 Shanshan Tian Email: [710836163@qq.com](mailto:710836163@qq.com)

25

26

27

28

29

30

31

32

33

34

35

36

37

38

39

40

41

42

43

44

45

46

### 47 **Author Contributions**

48 JL and HH are both first writer who analysed the data by python and wrote  
49 the first draft of the manuscript.YD and TS are both corresponding author  
50 who wrote part of the draft and designed the original research. Chongqing  
51 University Central Hospital,Chongqing University Qianjiang Hospital , Yubei  
52 District hospital and Bishan hospital of Chongqing Medical University  
53 provided the database of all cases of the patients. The others collected  
54 data and wrote sections of the manuscript. All authors took part in the  
55 research and contributed to manuscript revision, read,and approved the  
56 submitted version.

57

### 58 **Data availability statement**

59 The codes,models,analysis results can be provided for researchers if needed  
60 by the corresponding author.

61

### 62 **Acknowledgements**

63 The authors would like to thank the colleagues in the information and  
64 imaging departments for their hard work contributing to the final research  
65 results.

### 66 **Ethics approval statement**

67 We confirm that we have read the Journal's position on issues involved in  
68 ethical publication and affirm that this report is consistent with those  
69 guidelines.

### 70 **Funding statement**

71 The research is funded by Based on artificial intelligence and multiple  
72 omics technology set up a system of auxiliary cardiovascular disease  
73 diagnosis and treatment(2023CDJYGRH-ZD06);by Emergency medicine Key  
74 laboratory of Chongqing Joint Fund for Talent Innovation and development  
75 (2024RCCX10) ,by Brain-like intelligence research Key laboratory of  
76 chongqing Education Commission(BIR2019004)

77 **Conflict of interests**

78 The authors have no relevant conflicts of interest to disclose.

79

80 **Patient consent statement**

81 This study was a retrospective study and only deidentified patient data  
82 were collected, exempting the need for patient informed consent rights.

83

84 **Permission to reproduce material from other sources**

85 There are no reproduce material from other sources.

86

87 **Clinical trial registration**

88 The trail number is RS202406.

89

## 90 Abstract

### 91 Objective:

92 *Post-stroke epilepsy (PSE) is a significant complication that has a negative impact*  
93 *on the prognosis and quality of life of ischemic stroke patients. We collected medical*  
94 *records from 4 hospitals in Chongqing and created an interpretable machine learning*  
95 *model for prediction.*

### 96 Methods:

97 *We collected medical records, imaging reports, and laboratory tests from 21459*  
98 *patients with a diagnosis of ischemic stroke . We conducted traditional univariable and*  
99 *multivariable statistics analyses to compare and identify important features. Then the*  
100 *data was divided into a 70% training set and a 30% testing set. We employed the*  
101 *Synthetic Minority Oversampling Technique combined with Edited Nearest Neighbors*  
102 *method to resample an imbalanced dataset in the training set. Nine commonly used*  
103 *methods were used to build machine learning models, and relevant prediction metrics*  
104 *were compared to select the best-performing model. Finally, we used SHAP(SHapley*  
105 *Additive exPlanations) for model interpretability analysis, assessing the contribution*  
106 *and clinical significance of different features to the prediction.*

### 107 Results:

108 *In the traditional regression analysis, complications such as hydrocephalus,*  
109 *cerebral hernia, uremia, deep vein thrombosis; significant brain regions included the*  
110 *involvement of the cortical regions including frontal lobe, parietal lobe, occipital lobe,*  
111 *temporal lobe, subcortical region of basal ganglia, thalamus and so on contributed to*  
112 *PSE. General features such as age, gender, and the National Institutes of Health Stroke*  
113 *Scale score, as well as laboratory indicators including WBC count, D-dimer, lactate,*  
114 *HbA1c and so on were associated with a higher likelihood of PSE. Patients with*  
115 *conditions such as fatty liver, coronary heart disease, hyperlipidemia, and low HDL had*  
116 *a higher likelihood of developing PSE. The machine learning models, particularly tree*  
117 *models such as Random Forest, XGBoost, and LightGBM, demonstrated good predictive*  
118 *performance with an AUC of 0.99.*

### 119 Conclusion:

120 *The model built on a large dataset can effectively predict the likelihood of PSE, with*  
121 *tree-based models performing the best. The NIHSS score , WBC count and D-dimer were*  
122 *found to have the greatest impact.*

123

## 124 Introduction

125 Stroke is the second leading cause of death worldwide, with an annual mortality rate  
126 of approximately 5.5 million, and also the leading cause of disability globally, accounting

127 for 50% of cases [1]. Generally, ischemic stroke accounts for the majority, about 80% of  
128 stroke cases [2][3]. Post-stroke epilepsy (PSE) is a significant complication, with studies  
129 indicating that as many as 3-30% of stroke patients develop epilepsy, which has a  
130 negative impact on patients' prognosis and quality of life [4]. It can exacerbate cognitive,  
131 psychiatric, and physical impairments caused by cerebrovascular disease and  
132 comorbidities [5]. Furthermore, the highest incidence of PSE occurs within the first year  
133 after acute stroke, accounting for about half of the cases [2]. Therefore, early prediction  
134 and intervention for PSE, especially ischemic ones, are crucial.

135 Currently, most studies utilize clinical data to establish statistical models, survival  
136 analysis and cox regression [2][6], and multiple linear regression [7] to construct simple  
137 models for the prediction of PSE. Last year, Lin et al. developed a model based on  
138 radiomics that outperformed the conventional clinical model in predicting PSE related to  
139 intracerebral hemorrhage (ICH). They suggested that a combined radiomics-clinical  
140 model could better assist clinicians in assessing the individual risk of PSE after the first  
141 occurrence of ICH and facilitate early diagnosis and treatment of PSE [8]. However,  
142 subsequent studies have raised doubts regarding the application of radiomics, suggesting  
143 the need for further research [9]. Overall, there is still a relative scarcity of research on  
144 PSE prediction, with most studies focusing on the analysis of specific or certain risk  
145 factors [10][11][8][12] constructing simple models and hardly proposed or established a  
146 more comprehensive and scientifically accurate prediction model.

147 Machine learning has emerged as a promising approach in recent years for  
148 constructing medical models, as it excels in handling large volumes of data and complex  
149 information, and has been increasingly applied in neuroscience and clinical prediction  
150 [13][14][15]. Previous studies have utilized machine learning for related research on  
151 post-stroke cognitive impairments [16], stroke and myocardial infarction risk prediction  
152 models in large artery vasculitis patients [14], post-stroke depression prediction models  
153 based on liver function test indicators [17], and prediction of hematoma expansion in  
154 traumatic brain injury (TBI) [18]. Models constructed using machine learning algorithms  
155 can automatically handle linear or complex nonlinear relationships between different  
156 variables and provide insights into the contribution of different features to the prediction  
157 target, which is challenging for traditional statistical models. However, machine learning  
158 methods require a substantial amount of data and are prone to overfitting when trained on  
159 small sample data. The more valid and high-quality data input, the better machine  
160 learning algorithms can capture the underlying patterns between the data, thereby  
161 achieving more accurate predictions.

162 This study try to select important risk factors from mutiple feaures extracted from  
163 the clinical records and examination data of ischemic stroke patients and subsequently  
164 develops a prediction model for PSE using machine learning methods. By utilizing  
165 relevant early admission features of ischemic stroke patients, we aim to automatically  
166 predict the probability of PSE occurrence and further guide clinical decision-making and  
167 nursing care.

## 168 **Research content and method**

### 169 **Research patients**

170 This study retrospectively included all stroke patients admitted to the Chongqing  
171 Emergency Center between June 2017 and June 2022 for the development of the  
172 prediction model. Subsequently, patient data from three external validation centers,  
173 namely, Qianjiang Central Hospital, Bishan District People's Hospital, and Yubei District  
174 Traditional Chinese Medicine Hospital, were collected between July 2022 and July 2023  
175 for external validation and evaluation of the model. The external validation cohort  
176 focused more on collecting positive cases to examine the model's ability to identify  
177 positive samples.

178 Inclusion criteria: (1) Age between 18 and 90 years at admission; (2) Diagnosed  
179 with acute ischemic stroke and hospitalized for treatment.

180 Exclusion criteria: (1) Patients with a history of stroke or transient ischemic attack  
181 (TIA); (2) Patients with a history of other conditions such as traumatic brain injury,  
182 intracranial tumors, or cerebral vascular malformations that may cause epilepsy; (3)  
183 Patients with a history of epilepsy or who have received antiseizure medications for the  
184 prevention of seizures or for other diseases (such as migraine or psychiatric disorders); (4)  
185 Patients who died within 72 hours after stroke onset.

186 This study collected de-identified data from relevant patients for the construction of  
187 a multi-modal database for stroke patients. The study protocol was approved by the  
188 Ethics Committees of Chongqing University Center Hospital, Chongqing University  
189 Qianjiang Central Hospital, Bishan District People's Hospital, and Yubei Traditional  
190 Chinese Medicine Hospital.

191 The procedure of selection is in figure1. Total there are 42079 records from the  
192 stroke database, 24733 patients were diagnosed as ischemic stroke or lacunar stroke with  
193 new onset. Then we excluded hemorrhage stroke(4565), history of stroke(2154),  
194 TIA(3570), unclear cause stroke(561) and records who missed important data(6496).  
195 Then we excluded patients whose seizure might be attributed to other potential causes  
196 (brain tumor, intracranial vascular malformation, traumatic brain injury, etc)(865). Then  
197 we exclude patient who had a seizure history(152) or died in hospital (1444). Then we  
198 excluded patients who were lost to follow-up (had no outpatient records and can't contact  
199 by phone )or died within 3 months of the stroke incident(813). Finally 21459 cases are  
200 involved in this research.

201

### 202 **Data collection**

203 We extracted all records and other relevant data from the database of the  
204 hospitals. Under the structure of PostgreSQL we coded Structured Query  
205 Language to manage different data as follows:

206 (1) General information: gender, age, NIHSS(the National Institutes of Health  
207 Stroke Scale) score at admission;

208 (2) (2) Comorbidities and complications: uremia, DVT(previous deep vein  
209 thrombosis), diabetes mellitus, hypertension, coronary atherosclerosis, atrial fibrillation,  
210 cerebral hernia, hydrocephalus, hypoproteinemia, hyperuricemia, hyperlipidemia, internal  
211 carotid stenosis, common carotid stenosis,etc.

212 (3) According to CT or MRI records, the patient's cortical lobes and subcortical  
213 involvement were counted: frontal lobe \ parietal lobe \ temporal lobe \ occipital lobe \  
214 insular lobe \ basal ganglia \ internal capsule \ brain stem \ cerebellum \ periventricular \  
215 centrum semiovale \ thalamus involvement. In addition, the extent of cortical  
216 involvement (frontal lobe, parietal lobe, temporal lobe, occipital lobe and insular lobe  
217 each accumulated 1 point) and the extent of subcortical involvement (basal ganglia,  
218 internal capsule, brain stem, periventricular, thalamus and cerebellum any accumulated 1  
219 point) were summarized.

220 (4) According to CTA, MRA or DSA records, the patient's vascular stenosis or  
221 occlusion was counted: ACA(anterior cerebral artery) \ MCA(middle cerebral artery) \  
222 PCA(posterior cerebral artery) \ VA(vertebral artery) \ BA(basilar artery)

223 (5) Important laboratory indicators: Blood lipids (TG(Triglyceride), HDL(High  
224 Density Lipoprotein Cholesterol), LDL(Low Density Lipoprotein Cholesterol)), liver  
225 function (ALT(Alanine Transaminase), AST(Aspartate Aminotransferase), Bilirubin,  
226 Albumin), renal function (Urea, BUA(Blood Uric Acid), Creatinine), blood gas (Lactate,  
227 Anion Gap, TCO<sub>2</sub>(Total Carbon Dioxide)), coagulation related indicators  
228 (INR(International Normalized Ratio), PT(Prothrombin Time), APTT(Activated Partial  
229 Thromboplastin Time), TT(Thrombin Time), D-Dimer, Fibrinogen) and myocardial  
230 enzymes (CK(Creatine Kinase), CK-MB(Creatine Kinase Isoenzyme), LDH(Lactate  
231 Dehydrogenase), IMA(Ischemic Modified Albumin), HBDH( $\alpha$ -Hydroxybutyrate  
232 Dehydrogenase)).

233

## 234 **Data processing and model building**

235 (Processing of missing data) We counted the values of all laboratory indicators for  
236 the first time after stroke admission( everyone who was admitted because of stroke would  
237 perform blood routine , liver and kidney function and so on), excluded indicators with  
238 missing values of more than 10%, and filled the data of the remaining indicators with  
239 missing values by random forest algorithm using the default parameter. First, we go  
240 through all the features, starting with the one with the least missing (since the least  
241 accurate information is needed to fill in the feature with the least missing). When filling  
242 in a feature, replace the missing value of the other feature with 0. Each time a regression  
243 prediction is completed, the predicted value is placed in the original feature matrix and  
244 the next feature is filled in. After going through all the features, the data is complete.

245 (Distribution of characteristics) Univariate analysis was used to examine the  
246 distribution of characteristics between the PSE negative group and the positive group.  
247 The data were then divided into a training set and a test set by .

248 (Processing of unbalanced data) Considering the low incidence of PSE and the small  
249 proportion of positive patients, the positive data of the training set were augmented by  
250 Synthetic Minority Over-sampling Technique combined with Edited Nearest Neighbors  
251 by using default parameter of SMOTEENN method from imblearn python package and  
252 set random seed at 42 for repetition.



253 (Processing of categorical data) For categorical data, the one-hot method is used for  
254 transformation. The LASSO method was then used in the training set to screen the  
255 important features.

256 (Model building) We first used LASSO regression to select the 20 most important  
257 features. Next, we employed 9 common machine learning methods, including Naive  
258 Bayes, Logistic Regression, Decision Tree, Random Forest, Gradient Boosting, Multi-  
259 Layer Perceptron, XGBoost, LightGBM, and K-Nearest Neighbors. We then optimized  
260 the hyperparameters of each model through grid search to improve their performance. To  
261 evaluate the models, we calculated metrics such as accuracy, sensitivity, specificity, F1-  
262 score, positive predictive value, and negative predictive value. We also plotted the ROC  
263 curve, calibration curve, and decision curve. Additionally, we used an independent  
264 external validation dataset to assess the generalization performance of the selected model.  
265 Finally, we leveraged the SHAP algorithm to perform an interpretable analysis of the  
266 best-performing model, investigating the contribution of each feature to the model's  
267 predictions and their clinical significance. Through this series of model building,  
268 optimization, and analysis, we developed a machine learning model with good predictive  
269 performance and interpretability, providing valuable support for clinical decision-making.

270

## 271 **Statistical approach**

272 PostgreSQL v15 (<http://www.postgresql.org/>) was used to search and extract the  
273 data from the local database.

274 The open-source statistical package "Scipy.stats" in Python was used for statistical  
275 analysis. The details of the univariate significance analysis for each feature are as follows:

276 First, the Shapiro-Wilk test was used to check the normality of the distribution for  
277 each feature. For features that did not follow a normal distribution, the Mann-Whitney U  
278 test was used to assess their significance with respect to the target variable.

279 For features that exhibited a normal distribution, the Levene test was employed to  
280 assess the homogeneity of variances. Features with homogeneous variances were  
281 analyzed using the Student's t-test to determine their significance with respect to the  
282 target variable, while features with heterogeneous variances were analyzed using the  
283 Welch's t-test.

284 The confidence intervals for the AUC values and Brier scores were obtained by  
285 performing 1000 bootstrap resampling iterations on the corresponding datasets. The  
286 binary classification thresholds for the predicted probabilities generated by all models  
287 were established using the maximum Youden index derived from the training cohort.

288 Throughout the study, a two-tailed p-value less than 0.05 was considered  
289 statistically significant.

290 All the codes were uploaded at <https://github.com/conanan/lasso-ml>.

## 291 Results

### 292 Filling of missing data

293 These features had missing values that were filled using a Random Forest (RF)  
294 model, addressing the missing data one feature at a time: Plt, WBC, RBC, HbA1c, CRP,  
295 TG, LDL, HDL, AST, ALT, Bilirubin, Albumin, Urea, Creatinine, BUA, PT, APTT, TT,  
296 INR, D-dimer, Fibrinogen, CK, CK-MB, LDH, HBDH, IMA, Lactate, Anion\_gap, TCO2,  
297 NIHSS.

### 298 Characteristics of study participants

299 A total of 21459 patients were included in this study, of which 15021 patients were  
300 included in the training set, and the incidence of PSE was 4.3%. The test set contained  
301 6438 patients with a PSE incidence of 4.3%. The external validation cohort consisted of  
302 536 patients at three hospitals. Statistical details of the clinical characteristics of the  
303 patients are provided in the table1.

304 Statistical analysis showed that the patients who had higher possibility of PSE were  
305 with complications of uremia, history of DVT, atrial fibrillation, hyperuricemia, cerebral  
306 hernia and hydrocephalus. The involved locations of frontal lobe, parietal lobe, occipital  
307 lobe, temporal lobe, cortex, subcortex, basal ganglia and hypothalamus. The general  
308 characteristics included age, gender, nihss score; Laboratory indicators included wbc  
309 count, hba1c, crp, tg, ast, alt, bilirubin, urea, bua, aptt, tt, d\_dimer, ck, ckmb, ldh, hbdh,  
310 ima, lactate, and anion\_gap . Besides, the p values of fatty liver, coronary heart disease,  
311 hyperlipidemia, and hdl were significant, and patients with negative or low values of  
312 these indicators had a high risk of secondary disease. The statistics analysis result, the uni  
313 and multi regression analysis result table is in table1,table 2 and table 3.

### 314 Performance of machine learning models

315 The relevant indicators of the machine learning model are shown in table4, and the  
316 ROC curves, calibration curve and DCA are shown in figure3. It can be found that the  
317 over all models the AUC of tree models such as RF, XGboost and lightGBM are better  
318 than other models, and the PPV value of random forest is the highest, reaching 0.864,  
319 which is the most important function of our models. Complex machine learning  
320 algorithms were superior to traditional logistic regression. The Brier score of the  
321 calibration curve reached 0.006, and the DCA also showed good clinical decision-making  
322 benefits, which had good practical value. In the external validation cohort, we use the RF  
323 to predict. The Sensitivity was 0.91, the PPV was 0.95, demonstrate a good predictive  
324 ability of the model.

### 325 Analysis of SHAP risk factors

326 The analysis in Figure 4 shows the SHAP (Shapley Additive Explanations) values,  
327 individual decision attempts, and overall decision curves. Among the general  
328 characteristics, females had a higher rate of PSE.

329           Regarding the NIHSS score, higher score cause higher incidence rate  
330 of PSE .Higher values of WBC count, D-dimer, CRP , AST , CK-MB, HbA1c, bilirubin,  
331 TCO<sub>2</sub>, and LDH at admission were associated with a greater likelihood of developing  
332 PSE. Conversely, lower values of HBDH , PLT, and APTT were also linked to a higher  
333 probability of the outcome.However, the specific regions of the brain affected did not  
334 have a significant individual effect on the overall outcome.Among the complications,  
335 only hypertension was more strongly associated with the development of the outcome.  
336 Other conditions, such as coronary heart disease, diabetes, hyperlipidemia, and fatty liver,  
337 were less likely to be related to the outcome. We use the force plot of the first person to  
338 show the influence of different features of the first person, we can see that long APTT  
339 time contribute best to PSE, then the AST level and others, the NIHSS score may be low  
340 and contribute opposite to the final result. Then the decision plot is a collection of model  
341 decisions that show how complex models arrive at their predictions.

## 342 Discussion

343           Our study utilized comprehensive clinical data, imaging data, laboratory test data,  
344 from the database of the stroke patients and employed machine learning algorithms to  
345 establish a predictive model, achieving an AUC score of above 0.95, which demonstrated  
346 more accurate predictions compared to traditional statistical methods. Our research found  
347 that tree-based ensemble models showed superior overall prediction capabilities when  
348 dealing with large sample sizes and high-dimensional features.

349           During the modeling process, due to the extreme imbalance between negative and  
350 positive samples, we employed SMOTEENN technique to resample an imbalanced  
351 dataset for machine learning, resulting in improved training performance. Through SHAP  
352 analysis, we conducted interpretability analysis of the model and determined the  
353 importance of different features.

354           In our study, age and NIHSS score were treated as continuous variables. We found  
355 that, overall, female patients, older patients, and those with higher NIHSS scores were  
356 more prone to develop PSE, which is consistent with recent articles. High NIHSS scores,  
357 indicative of more severe stroke, increased the risk of complications, ranking only to  
358 white blood cell count and d-dimer in our model [5][19][10][20]. However, there are  
359 conflicting opinions regarding the impact of age. Some researchs [5][21] suggested that  
360 age <65 is a high-risk factor, which aligns with our findings, while some studies [22]  
361 confirmed that advanced age is the determining factor. Yamada et al. [21] also concurred  
362 with our study in identifying a higher risk of complications among females, whereas  
363 Waafi et al. [10] indicated that the likelihood of male patients developing complications  
364 is 3.325 times that of females, which contradicts our findings.

365 Previous studies have shown that patients with diabetes, dyslipidemia, hypertension,  
366 depression, or dementia are at an increased risk of developing vascular epilepsy [12]. In  
367 our study, statistics and multiple ML models analyzed the association between  
368 comorbidities and complications, revealing that patients with coronary heart disease,  
369 diabetes, fatty liver, hyperlipidemia, or large artery stenosis or plaques(CCA and ICA)  
370 were less likely to develop epilepsy. According to the TOAST classification, ischemic  
371 stroke is categorized into five types: large artery atherosclerosis, cardioembolism, small  
372 vessel occlusion, other determined etiology, and undetermined etiology. Patients with  
373 combined comorbidities generally fall into the categories of large artery atherosclerosis  
374 and cardioembolism, which are relatively well-defined and easier to intervene, thus  
375 resulting in a lower likelihood of developing epilepsy. Conversely, strokes with  
376 undetermined etiology usually have a poor prognosis and are more likely to lead to  
377 epilepsy. Among diabetes patients, higher HbA1c levels indicate poorer blood sugar  
378 control, resulting in a higher probability of developing complications, which significantly  
379 affects certain patients, while those with good control have a lower overall risk of  
380 developing complications.

381 Alain et al. found that cortical infarction was more likely to result in epilepsy in  
382 patients hospitalized with anterior circulation ischemic stroke [23]. Lin et al. found that  
383 factors such as cortical involvement and intracerebral hemorrhage volume increased the  
384 likelihood of PSE, which is consistent with our research findings [8]. Al-Sahli et al. also  
385 suggested that cortical brain injury and large-area lesions increased the risk of PSE  
386 [5][21]. In our study, statistics showed affections of cortical and subcortical regions both  
387 increased the possibility of PSE, but had lower affection than the other features so didn't  
388 be selected in lasso regression.

389 Previous studies have found that acute infection is a risk factor for ischemic stroke  
390 [24]. C-reactive protein (CRP) reflects the level of inflammation and is an independent  
391 prognostic factor [25]. In our study, regression and SHAP analysis both showed that  
392 white blood cell count had great impact among the routine blood test parameters, in  
393 SHAP it even surpassed the NIHSS score. High white blood cell count may indicate  
394 severe inflammation and infection, as well as increased blood viscosity, making patients  
395 more susceptible to secondary complications. In general, high red blood cell count and  
396 low platelet count also have some influence.

397 A large-scale study on Chinese individuals found a negative correlation between  
398 plasma high-density lipoprotein cholesterol (HDL-C) concentration and the risk of  
399 ischemic stroke, a weak positive correlation between plasma triglyceride (TG)  
400 concentration and the risk of ischemic stroke, and a strong correlation between plasma  
401 low-density lipoprotein cholesterol (LDL-C) concentration and apolipoprotein B [26].  
402 High HDL-C levels are associated with better prognosis [27]. Our study is consistent with  
403 previous research, indicating that high LDL-C, low HDL-C, and high TG levels are more  
404 likely to lead to PSE. This can be easily understood as high cholesterol and triglyceride  
405 levels lead to increased blood viscosity and vascular sclerosis, making it easier for clots  
406 to form [12][28][29]. Higher D-dimer levels indicate greater brain tissue damage and a  
407 higher likelihood of PSE. Overall, lower activated partial thromboplastin time (APTT)  
408 and fibrinogen levels are associated with an increased risk of PSE. INR, PT, and TT have  
409 a smaller impact. Among liver function parameters, aspartate aminotransferase (AST) has  
410 the greatest influence on PSE, while high AST levels, low alanine aminotransferase (ALT)  
411 levels, and low albumin levels all have a certain degree of impact. Lingling Ding et al.  
412 found that liver enzyme subgroups characterized by alanine aminotransferase and  
413 aspartate aminotransferase were associated with a high risk of adverse function [30],  
414 which is consistent with our research.

415 Studies have shown that subgroups identified by renal function biomarkers such as  
416 urinary microalbumin, cystatin C, and creatinine have significantly higher stroke  
417 recurrence and poorer prognosis [30]. In our study, low urea levels and high uric acid  
418 levels had a negative impact [31][32][33]. Our research is similar to their conclusions.  
419 While elevated uric acid levels at admission are positively associated with PSE, patients  
420 previously diagnosed with hyperuricemia are less likely to develop epilepsy. Considering  
421 that uric acid functions as a strong reducing agent and has neuroprotective properties [34],  
422 patients with normal liver and kidney function and a certain degree of hyperuricemia  
423 have stronger resistance to emergencies [35][36]. However, excessively high uric acid  
424 levels indicate metabolic disorders and poor liver and kidney function, which are  
425 associated with poor prognosis.

426 When stroke patients are admitted, cardiac enzyme profile tests are often performed  
427 to rule out concurrent myocardial ischemia. However, studies have shown that elevated  
428 CK-MB in stroke patients may not only be related to the heart [37]. Multiple cardiac  
429 enzymes are important prognostic indicators [38][39] and have been included in stroke  
430 scores [40]. Some studies have shown a higher incidence of abnormal serum cardiac  
431 enzyme profiles in the acute phase of stroke. Although the incidence of abnormalities is  
432 unrelated to the nature of the stroke, it is associated with the severity of the stroke, with  
433 patients with consciousness disorders having a significantly higher incidence of abnormal  
434 cardiac enzyme profiles than those without consciousness disorders [41]. In our study,  
435 CK, CK-MB, and IMA in the cardiac enzyme profile had a significant impact and high  
436 predictive value, but the specific mechanisms require further research [34].

437 Although our study incorporates a large amount of information and utilizes almost  
438 all available data, including clinical data, imaging data, and laboratory test data, in an  
439 attempt to establish more accurate prediction models beyond traditional statistics using  
440 machine learning algorithms, there are still several limitations in the modeling process.

441 While the current study provides valuable insights, the data sample may not be fully  
442 representative, and the model's generalization ability requires further assessment.  
443 Although the data was collected from multiple tertiary hospitals, encompassing over  
444 20,000 cases, earlier data was lost due to hospital system upgrades. The collected data  
445 mainly represents patients diagnosed in the past five years and is primarily concentrated  
446 in the Chongqing region, which may limit the model's applicability to other geographic  
447 areas.

448 Additionally, the retrospective nature of the research has resulted in the lack of  
449 certain important predictive indicators. As this was a retrospective study, many  
450 potentially meaningful features, such as hemorheology, thromboelastography, and  
451 hormone levels, were significantly missing and had to be excluded. Incorporating these  
452 additional features could potentially improve the model's accuracy.

453 To enhance the predictive power of the model, it would be beneficial to incorporate  
454 more beyond baseline patient characteristics. For example, the current analysis primarily  
455 utilized the results of the first examination upon admission, without fully leveraging the  
456 information from subsequent examinations. In future research, the use of recurrent neural  
457 networks could facilitate the comprehensive extraction of features from the entire  
458 sequence of examinations.

459 To further strengthen the study, data standardization should be improved, and the  
460 number of cases and important indicators should continue to increase. Additionally, it  
461 would be advisable to explore more advanced scientific methods, such as deep learning,  
462 and fully leverage all available data to make more accurate predictions.

## 463 Conclusion

464 We developed an interpretable machine learning model to predict the risk of post-  
465 stroke epilepsy (PSE) in hospitalized patients with ischemic stroke. Leveraging a large  
466 volume of medical records, our artificial intelligence model demonstrates good predictive  
467 performance for PSE. The key predictors identified by the model include NIHSS score, D-  
468 dimer levels, lactate levels, and white blood cell count, followed by indicators related to  
469 liver function and cardiac enzyme profiles. The transparency and interpretability of the  
470 model's predictions can foster trust among clinical practitioners and facilitate decision-  
471 making. While the results are promising, further prospective studies are needed to validate  
472 the clinical utility of this tool before its application in real-world settings.

473

474

475

476

477

478

479

480

481

482

483

- 484 [1] Feigin V L, Krishnamurthi R V, Theadom A M, et al.. Global, Regional, and  
485 National Burden of Neurological Disorders during 1990–2015: A Systematic  
486 Analysis for the Global Burden of Disease Study 2015[J]. *The Lancet Neurology*,  
487 2017, 16(11): 877–897.
- 488 [2] Galovic M, Döhler N, Erdélyi-Canavese B, et al.. Prediction of Late Seizures  
489 after Ischaemic Stroke with a Novel Prognostic Model (the SeLECT Score): A  
490 Multivariable Prediction Model Development and Validation Study[J]. *The Lancet*  
491 *Neurology*, 2018, 17(2): 143.
- 492 [3] Krishnamurthi R V, Feigin V L, Forouzanfar M H, et al.. Global and Regional  
493 Burden of First-Ever Ischaemic and Haemorrhagic Stroke during 1990–2010:  
494 Findings from the Global Burden of Disease Study 2010[J]. *The Lancet Global Health*,  
495 2013, 1(5): e259–e281.
- 496 [4] Zhao Y, Li X, Zhang K, et al.. The Progress of Epilepsy after Stroke[J]. *Curr*  
497 *Neuropharmacol*, 2018, 16(1): 71–78.
- 498 [5] Al-Sahli O a M, Tibekina L, Subbotina O P, et al.. Post-Stroke Epileptic Seizures:  
499 Risk Factors, Clinical Presentation, Principles of Diagnosis and Treatment[J].  
500 *Epilepsy and paroxysmal conditions*, 2023, 15(2): 148–159.
- 501 [6] Chen Z, Churilov L, Chen Z, et al.. Association between Implementation of a  
502 Code Stroke System and Poststroke Epilepsy[J]. *Neurology*, 2018, 90(13): e1126–  
503 e1133.
- 504 [7] Merkler A E, Gialdini G, Lerario M P, et al.. Population-Based Assessment of  
505 the Long-Term Risk of Seizures in Survivors of Stroke[J]. *Stroke*, 2018, 49(6): 1319–  
506 1324.
- 507 [8] Lin R, Lin J, Xu Y, et al.. Development and Validation of a Novel Radiomics-  
508 Clinical Model for Predicting PSE after First-Ever Intracerebral Haemorrhage[J].  
509 *European Radiology*, 2023, 33(7): 4526–4536.
- 510 [9] Pszczolkowski S, Law Z K. Editorial Comment on «Development and  
511 Validation of a Novel Radiomics-Clinical Model for Predicting PSE after First-Ever  
512 Intracerebral Haemorrhage» [J]. *European Radiology*, 2023, 33(7): 4524–4525.
- 513 [10] Waafi A K, Husna M, Damayanti R, et al.. Clinical Risk Factors Related to PSE  
514 Patients in Indonesia: A Hospital-Based Study[J]. *Egyptian Journal of Neurology*,  
515 *Psychiatry and Neurosurgery*, 2023, 59(1).
- 516 [11] Herzig-Nichtweiß J, Salih F, Berning S, et al.. Prognosis and Management of  
517 Acute Symptomatic Seizures: A Prospective, Multicenter, Observational Study[J].  
518 *Annals of Intensive Care*, 2023, 13(1).
- 519 [12] Pitkänen A, Roivainen R, Lukasiuk K. Development of Epilepsy after  
520 Ischaemic Stroke[J]. *The Lancet Neurology*, 2016, 15(2): 185–197.

- 521 [13] The Artificial Intelligence Revolution in Stroke Care: A Decade of Scientific  
522 Evidence in Review[J]. World Neurosurgery, Elsevier, 2024.
- 523 [14] Predicting Stroke and Myocardial Infarction Risk in Takayasu Arteritis with  
524 Automated Machine Learning Models[J]. iScience, Elsevier, 2023, 26(12): 108421.
- 525 [15] Daidone M, Ferrantelli S, Tuttolomondo A, et al.. Machine Learning  
526 Applications in Stroke Medicine: Advancements, Challenges, and Future  
527 Prospective[J]. Neural Regeneration Research, 2024, 19(4): 769–773.
- 528 [16] Lee M, Yeo N-Y, Ahn H-J, et al.. Prediction of Post-Stroke Cognitive  
529 Impairment after Acute Ischemic Stroke Using Machine Learning[J]. Alzheimer's  
530 Research and Therapy, 2023, 15(1).
- 531 [17] Gong J, Zhang Y, Zhong X, et al.. Liver Function Test Indices-Based Prediction  
532 Model for Post-Stroke Depression: A Multicenter, Retrospective Study[J]. BMC  
533 Medical Informatics and Decision Making, 2023, 23(1).
- 534 [18] He H, Liu J, Li C, et al.. Predicting Hematoma Expansion and Prognosis in  
535 Cerebral Contusions: A Radiomics-Clinical Approach[J]. Journal of Neurotrauma,  
536 2024: neu.2023.0410.
- 537 [19] Lin R, Yu Y, Wang Y, et al.. Risk of PSE Following Stroke-Associated Acute  
538 Symptomatic Seizures[J]. Frontiers in Aging Neuroscience, 2021, 13.
- 539 [20] Zöllner J P, Misselwitz B, Kaps M, et al.. National Institutes of Health Stroke  
540 Scale (NIHSS) on Admission Predicts Acute Symptomatic Seizure Risk in Ischemic  
541 Stroke: A Population-Based Study Involving 135,117 Cases[J]. Scientific Reports,  
542 2020, 10(1).
- 543 [21] Yamada S, Nakagawa I, Tamura K, et al.. Investigation of Poststroke Epilepsy  
544 (INPOSE) Study: A Multicenter Prospective Study for Prediction of Poststroke  
545 Epilepsy[J]. J Neurol, 2020, 267(11): 3274–3281.
- 546 [22] Lidetu T, Zewdu D. Incidence and Predictors of Post Stroke Seizure among  
547 Adult Stroke Patients Admitted at Felege Hiwot Compressive Specialized Hospital,  
548 Bahir Dar, North West Ethiopia, 2021: A Retrospective Follow up Study[J]. BMC  
549 Neurology, 2023, 23(1).
- 550 [23] Lekoubou A, Ssentongo P, Maffie J, et al.. Associations of Small Vessel Disease  
551 and Acute Symptomatic Seizures in Ischemic Stroke Patients[J]. Epilepsy & Behavior,  
552 2023, 145: 109233.
- 553 [24] Bova I Y, Bornstein N M, Korczyn. Acute Infection as a Risk Factor for  
554 Ischemic Stroke[J]. Stroke, 1996, 27(12): 2204–2206.
- 555 [25] Di Napoli M, Papa F, Bocola V. C-Reactive Protein in Ischemic Stroke an  
556 Independent Prognostic Factor[J]. Stroke, 2001, 32(4): 917–924.



- 557 [26] Sun L, Clarke R, Bennett D, et al.. Causal Associations of Blood Lipids with  
558 Risk of Ischemic Stroke and Intracerebral Hemorrhage in Chinese Adults[J]. *Nat Med*,  
559 Nature Publishing Group, 2019, 25(4): 569–574.
- 560 [27] Bandeali S, Farmer J. High-Density Lipoprotein and Atherosclerosis: The Role  
561 of Antioxidant Activity[J]. *Current Atherosclerosis Reports*, 2012, 14(2): 101–107.
- 562 [28] Gasparini S, Neri S, Brigo F, et al.. Late Epileptic Seizures Following Cerebral  
563 Venous Thrombosis: A Systematic Review and Meta-Analysis[J]. *Neurol Sci*, 2022,  
564 43(9): 5229–5236.
- 565 [29] Abraira L, Giannini N, Santamarina E, et al.. Correlation of Blood Biomarkers  
566 with Early-Onset Seizures after an Acute Stroke Event[J]. *Epilepsy & Behavior*, 2020,  
567 104: 106549.
- 568 [30] Ding L, Liu Y, Meng X, et al.. Biomarker and Genomic Analyses Reveal  
569 Molecular Signatures of Non-Cardioembolic Ischemic Stroke[J]. *Sig Transduct Target*  
570 *Ther*, Nature Publishing Group, 2023, 8(1): 1–16.
- 571 [31] Zhang W, Cheng Z, Fu F, et al.. Serum Uric Acid and Prognosis in Acute  
572 Ischemic Stroke: A Dose–Response Meta-Analysis of Cohort Studies[J]. *Frontiers in*  
573 *Aging Neuroscience*, 2023, 15.
- 574 [32] Wang D, Hu B, Dai Y, et al.. Serum Uric Acid Is Highly Associated with  
575 Epilepsy Secondary to Cerebral Infarction[J]. *Neurotox Res*, 2019, 35(1): 63–70.
- 576 [33] Wang C, Cui T, Wang L, et al.. Prognostic Significance of Uric Acid Change in  
577 Acute Ischemic Stroke Patients with Reperfusion Therapy[J]. *Eur J Neurol*, 2021,  
578 28(4): 1218–1224.
- 579 [34] Ng G J L, Quek A M L, Cheung C, et al.. Stroke Biomarkers in Clinical Practice:  
580 A Critical Appraisal[J]. *NeuroChemistry International*, 2017, 107: 11–22.
- 581 [35] Amaro S, Urrea X, Gómez-Choco M, et al.. Uric Acid Levels Are Relevant in  
582 Patients With Stroke Treated With Thrombolysis[J]. *Stroke*, American Heart  
583 Association, 2011, 42(1\_suppl\_1): S28–S32.
- 584 [36] Amaro S, Urrea X, Gómez-Choco M, et al.. Uric Acid Levels Are Relevant in  
585 Patients with Stroke Treated with Thrombolysis[J]. *Stroke*, 2011, 42(SUPPL. 1):  
586 S28–S32.
- 587 [37] Ay H, Arsava E M, Sarba O. Creatine Kinase-MB Elevation after Stroke Is Not  
588 Cardiac in Origin Comparison with Troponin T Levels[J]. *Stroke*, 2002, 33(1): 286–  
589 289.
- 590 [38] Liu X, Chen X, Wang H, et al.. Prognostic Significance of Admission Levels of  
591 Cardiac Indicators in Patients with Acute Ischaemic Stroke: Prospective  
592 Observational Study[J]. *J Int Med Res*, SAGE Publications Ltd, 2014, 42(6): 1301–  
593 1310.

- 594 [39] Zeng Y-Y, Zhang W-B, Cheng L, et al.. Cardiac Parameters Affect Prognosis in  
595 Patients with Non-Large Atherosclerotic Infarction[J]. Molecular Medicine, 2021,  
596 27(1): 2.
- 597 [40] Hijazi Z, Lindbäck J, Alexander J H, et al.. The ABC (Age, Biomarkers, Clinical  
598 History) Stroke Risk Score: A Biomarker-Based Risk Score for Predicting Stroke in  
599 Atrial Fibrillation[J]. European Heart Journal, 2016, 37(20): 1582–1590.
- 600 [41] Zheng Yuan-Hui, ZHENG Jin-Yi, ZHANG Jian. Changes of serum myocardial  
601 enzyme profile in acute stage of stroke [J]. Chinese Journal of Advanced Medical  
602 Doctors, China Medical Journal, 2009, 32(07): 46 -- 47.

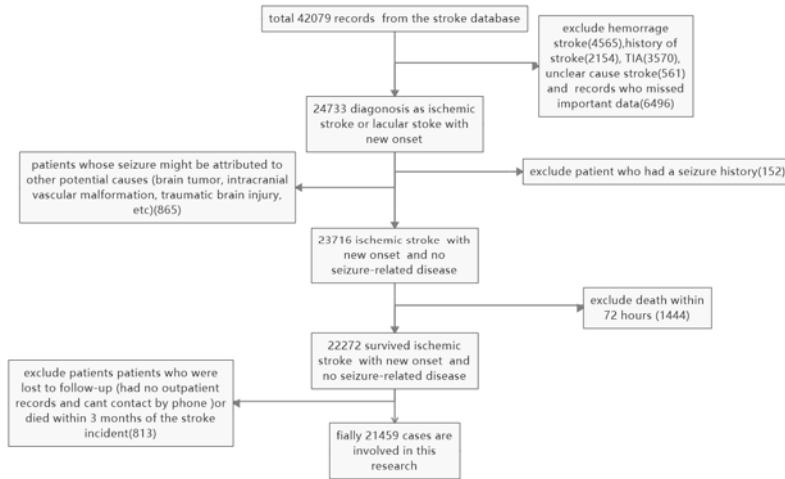

Figure 1. Selection and exclusion procedure of patients

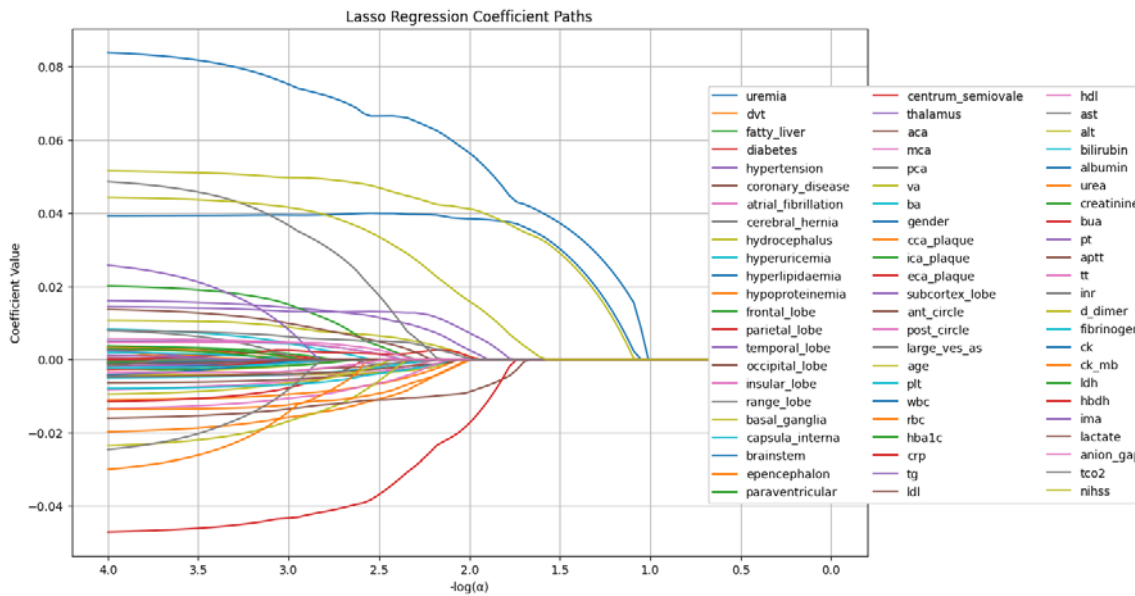

Figure 2. LASSO Regression Coefficient Paths

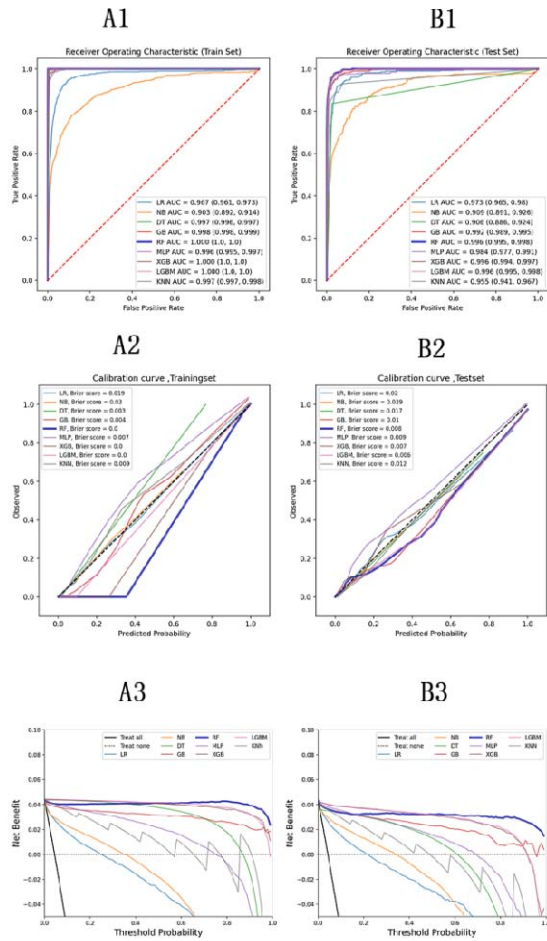

Figure 3. ROC of train(A1), ROC of test(B1), CC of train(A2), CC of test(B2), PCA of train(A3), PCA of test(B3)

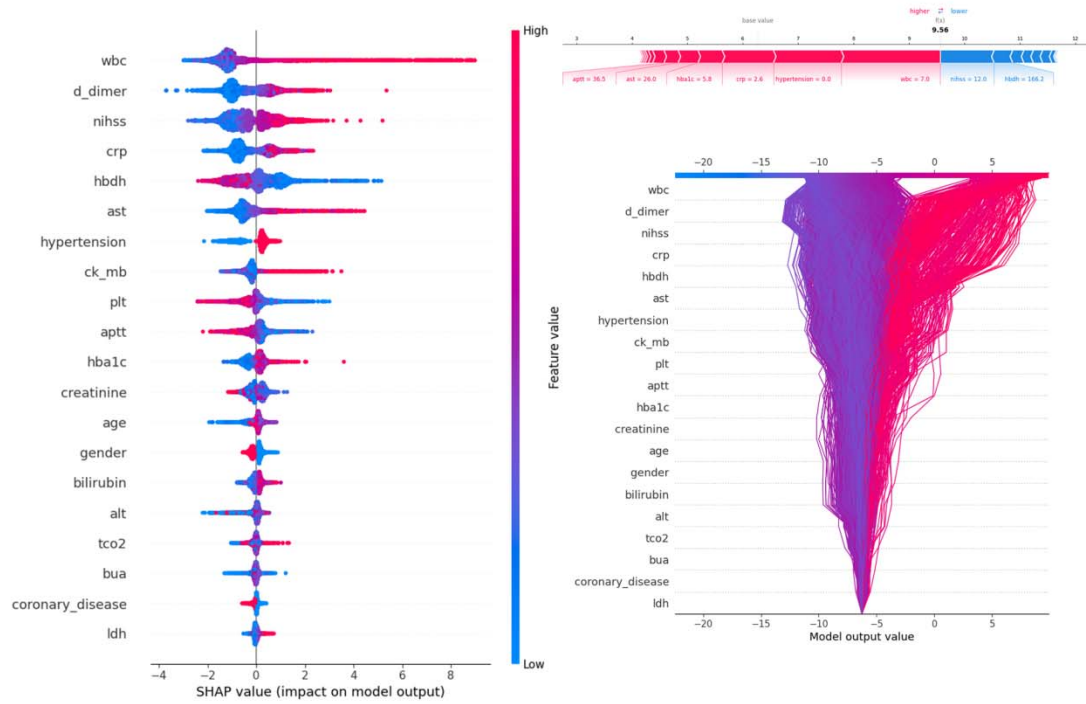

Figure 4.SHAP value(left),force plot(upper right) and decision plot (lower right)

| Feature        | positive, N=954 | negative, N = 20789 | method     | P        | stats     |
|----------------|-----------------|---------------------|------------|----------|-----------|
| eca_plaque     | -               | -                   | Chi-Square | 0.438971 | 0.59897   |
| —0             | 942 (98.742%)   | 20591 (99.048%)     | -          | -        | -         |
| —1             | 12 (1.258%)     | 198 (0.952%)        | -          | -        | -         |
| subcortex_lobe | -               | -                   | Chi-Square | 0.001273 | 10.381551 |
| —0             | 814 (85.325%)   | 18454 (88.768%)     | -          | -        | -         |
| —1             | 140 (14.675%)   | 2335 (11.232%)      | -          | -        | -         |
| ba             | -               | -                   | Chi-Square | 0.991017 | 0.000127  |
| —0             | 945 (99.057%)   | 20605 (99.115%)     | -          | -        | -         |
| —1             | 9 (0.943%)      | 184 (0.885%)        | -          | -        | -         |
| hypertension   | -               | -                   | Chi-Square | 0.602539 | 0.271184  |

|                  |    |               |                 |            |          |           |
|------------------|----|---------------|-----------------|------------|----------|-----------|
|                  | —0 | 290 (30.398%) | 6497 (31.252%)  | -          | -        | -         |
|                  | —1 | 664 (69.602%) | 14292 (68.748%) | -          | -        | -         |
| ica_plaque       |    | -             | -               | Chi-Square | 0.152086 | 2.051203  |
|                  | —0 | 878 (92.034%) | 19392 (93.28%)  | -          | -        | -         |
|                  | —1 | 76 (7.966%)   | 1397 (6.72%)    | -          | -        | -         |
| frontal_lobe     |    | -             | -               | Chi-Square | 0        | 53.171781 |
|                  | —0 | 868 (90.985%) | 19943 (95.931%) | -          | -        | -         |
|                  | —1 | 86 (9.015%)   | 846 (4.069%)    | -          | -        | -         |
| cerebral_hernia  |    | -             | -               | Chi-Square | 0.000032 | 17.284355 |
|                  | —0 | 934 (97.904%) | 20626 (99.216%) | -          | -        | -         |
|                  | —1 | 20 (2.096%)   | 163 (0.784%)    | -          | -        | -         |
| thalamus         |    | -             | -               | Chi-Square | 0.060918 | 3.512207  |
|                  | —0 | 937 (98.218%) | 20565 (98.923%) | -          | -        | -         |
|                  | —1 | 17 (1.782%)   | 224 (1.077%)    | -          | -        | -         |
| occipital_lobe   |    | -             | -               | Chi-Square | 0.000034 | 17.17679  |
|                  | —0 | 919 (96.331%) | 20422 (98.235%) | -          | -        | -         |
|                  | —1 | 35 (3.669%)   | 367 (1.765%)    | -          | -        | -         |
| pca              |    | -             | -               | Chi-Square | 0.891182 | 0.018717  |
|                  | —0 | 952 (99.79%)  | 20729 (99.711%) | -          | -        | -         |
|                  | —1 | 2 (0.21%)     | 60 (0.289%)     | -          | -        | -         |
| paraventricular  |    | -             | -               | Chi-Square | 0.213759 | 1.545786  |
|                  | —0 | 899 (94.235%) | 19786 (95.175%) | -          | -        | -         |
|                  | —1 | 55 (5.765%)   | 1003 (4.825%)   | -          | -        | -         |
| mca              |    | -             | -               | Chi-Square | 0.393066 | 0.729435  |
|                  | —0 | 912 (95.597%) | 19998 (96.195%) | -          | -        | -         |
|                  | —1 | 42 (4.403%)   | 791 (3.805%)    | -          | -        | -         |
| coronary_disease |    | -             | -               | Chi-Square | 0        | 26.19087  |

|                 |    |               |                 |            |          |           |
|-----------------|----|---------------|-----------------|------------|----------|-----------|
|                 | —0 | 599 (62.788%) | 11288 (54.298%) | -          | -        | -         |
|                 | —1 | 355 (37.212%) | 9501 (45.702%)  | -          | -        | -         |
| hypoproteinemia |    | -             | -               | Chi-Square | 0        | 53.351931 |
|                 | —0 | 774 (81.132%) | 18479 (88.888%) | -          | -        | -         |
|                 | —1 | 180 (18.868%) | 2310 (11.112%)  | -          | -        | -         |
| parietal_lobe   |    | -             | -               | Chi-Square | 0        | 57.137771 |
|                 | —0 | 884 (92.662%) | 20180 (97.071%) | -          | -        | -         |
|                 | —1 | 70 (7.338%)   | 609 (2.929%)    | -          | -        | -         |
| aca             |    | -             | -               | Chi-Square | 0.928981 | 0.007944  |
|                 | —0 | 941 (98.637%) | 20524 (98.725%) | -          | -        | -         |
|                 | —1 | 13 (1.363%)   | 265 (1.275%)    | -          | -        | -         |
| brainstem       |    | -             | -               | Chi-Square | 0.294979 | 1.096759  |
|                 | —0 | 938 (98.323%) | 20532 (98.764%) | -          | -        | -         |
|                 | —1 | 16 (1.677%)   | 257 (1.236%)    | -          | -        | -         |
| hyperuricemia   |    | -             | -               | Chi-Square | 0.000001 | 25.147468 |
|                 | —0 | 801 (83.962%) | 18547 (89.215%) | -          | -        | -         |
|                 | —1 | 153 (16.038%) | 2242 (10.785%)  | -          | -        | -         |
| temporal_lobe   |    | -             | -               | Chi-Square | 0        | 57.872112 |
|                 | —0 | 886 (92.872%) | 20209 (97.21%)  | -          | -        | -         |
|                 | —1 | 68 (7.128%)   | 580 (2.79%)     | -          | -        | -         |
| diabetes        |    | -             | -               | Chi-Square | 0.389926 | 0.739172  |
|                 | —0 | 617 (64.675%) | 13737 (66.078%) | -          | -        | -         |
|                 | —1 | 337 (35.325%) | 7052 (33.922%)  | -          | -        | -         |
| range_lobe      |    | -             | -               | Chi-Square | 0        | 85.377485 |
|                 | —0 | 830 (87.002%) | 19559 (94.083%) | -          | -        | -         |
|                 | —1 | 43 (4.507%)   | 467 (2.246%)    | -          | -        | -         |
|                 | —2 | 32 (3.354%)   | 329 (1.583%)    | -          | -        | -         |

|                     |    |               |                 |            |          |           |
|---------------------|----|---------------|-----------------|------------|----------|-----------|
|                     | —3 | 31 (3.249%)   | 224 (1.077%)    | -          | -        | -         |
|                     | —4 | 15 (1.572%)   | 175 (0.842%)    | -          | -        | -         |
|                     | —5 | 3 (0.314%)    | 35 (0.168%)     | -          | -        | -         |
| epencephalon        |    | -             | -               | Chi-Square | 1        | 0         |
|                     | —0 | 934 (97.904%) | 20362 (97.946%) | -          | -        | -         |
|                     | —1 | 20 (2.096%)   | 427 (2.054%)    | -          | -        | -         |
| hydrocephalus       |    | -             | -               | Chi-Square | 0        | 181.23517 |
|                     | —0 | 895 (93.816%) | 20565 (98.923%) | -          | -        | -         |
|                     | —1 | 59 (6.184%)   | 224 (1.077%)    | -          | -        | -         |
| insular_lobe        |    | -             | -               | Chi-Square | 0.391042 | 0.735699  |
|                     | —0 | 938 (98.323%) | 20519 (98.701%) | -          | -        | -         |
|                     | —1 | 16 (1.677%)   | 270 (1.299%)    | -          | -        | -         |
| gender              |    | -             | -               | Chi-Square | 0        | 44.244052 |
|                     | —0 | 372 (38.994%) | 10407 (50.06%)  | -          | -        | -         |
|                     | —1 | 582 (61.006%) | 10382 (49.94%)  | -          | -        | -         |
| uremia              |    | -             | -               | Chi-Square | 0.00008  | 15.568169 |
|                     | —0 | 934 (97.904%) | 20618 (99.177%) | -          | -        | -         |
|                     | —1 | 20 (2.096%)   | 171 (0.823%)    | -          | -        | -         |
| atrial_fibrillation |    | -             | -               | Chi-Square | 0.008017 | 7.029734  |
|                     | —0 | 838 (87.841%) | 18811 (90.485%) | -          | -        | -         |
|                     | —1 | 116 (12.159%) | 1978 (9.515%)   | -          | -        | -         |
| centrum_semiovale   |    | -             | -               | Chi-Square | 0.36206  | 0.830735  |
|                     | —0 | 922 (96.646%) | 20207 (97.2%)   | -          | -        | -         |
|                     | —1 | 32 (3.354%)   | 582 (2.8%)      | -          | -        | -         |
| basal_ganglia       |    | -             | -               | Chi-Square | 0.005355 | 7.755329  |
|                     | —0 | 893 (93.606%) | 19869 (95.575%) | -          | -        | -         |
|                     | —1 | 61 (6.394%)   | 920 (4.425%)    | -          | -        | -         |



|                 |                  |                  |                |          |            |
|-----------------|------------------|------------------|----------------|----------|------------|
| dvt             | -                | -                | Chi-Square     | 0        | 40.790867  |
| —0              | 847 (88.784%)    | 19534 (93.963%)  | -              | -        | -          |
| —1              | 107 (11.216%)    | 1255 (6.037%)    | -              | -        | -          |
| fatty_liver     | -                | -                | Chi-Square     | 0.000171 | 14.123893  |
| —0              | 812 (85.115%)    | 16655 (80.114%)  | -              | -        | -          |
| —1              | 142 (14.885%)    | 4134 (19.886%)   | -              | -        | -          |
| hyperlipidaemia | -                | -                | Chi-Square     | 0.000317 | 12.969155  |
| —0              | 801 (83.962%)    | 16439 (79.075%)  | -              | -        | -          |
| —1              | 153 (16.038%)    | 4350 (20.925%)   | -              | -        | -          |
| cca_plaque      | -                | -                | Chi-Square     | 0.376965 | 0.780577   |
| —0              | 751 (78.721%)    | 16100 (77.445%)  | -              | -        | -          |
| —1              | 203 (21.279%)    | 4689 (22.555%)   | -              | -        | -          |
| va              | -                | -                | Chi-Square     | 0.797483 | 0.065847   |
| —0              | 927 (97.17%)     | 20159 (96.97%)   | -              | -        | -          |
| —1              | 27 (2.83%)       | 630 (3.03%)      | -              | -        | -          |
| fibrinogen      | 3.518 ± 0.663    | 3.602 ± 0.464    | Mann-Whitney U | 0.434584 | 10064078.5 |
| d_dimer         | 4.362 ± 4.398    | 1.198 ± 0.98     | Mann-Whitney U | 0        | 3555180.5  |
| bua             | 342.521 ± 74.651 | 344.132 ± 58.336 | Mann-Whitney U | 0.000037 | 10698805.5 |
| tco2            | 22.739 ± 1.025   | 22.781 ± 1.225   | Mann-Whitney U | 0.166751 | 10178363   |
| hbdh            | 209.295 ± 57.826 | 175.906 ± 48.18  | Mann-Whitney U | 0        | 6107843    |
| anion_gap       | 13.026 ± 1.456   | 12.345 ± 1.368   | Mann-Whitney U | 0        | 6496800    |
| ldl             | 2.686 ± 0.372    | 2.685 ± 0.361    | Mann-Whitney U | 0.23394  | 10140916.5 |

|           |                  |                  |                |          |            |
|-----------|------------------|------------------|----------------|----------|------------|
| tt        | 16.636 ± 0.809   | 16.432 ± 0.615   | Mann-Whitney U | 0        | 7950954.5  |
| nihss     | 11.529 ± 2.564   | 7.886 ± 2.871    | Mann-Whitney U | 0        | 2984725.5  |
| albumin   | 40.734 ± 2.37    | 40.886 ± 2.257   | Mann-Whitney U | 0.025821 | 10338834.5 |
| inr       | 1.068 ± 0.072    | 1.076 ± 0.149    | Mann-Whitney U | 0        | 9016933.5  |
| tg        | 1.662 ± 0.484    | 1.536 ± 0.433    | Mann-Whitney U | 0        | 7582690.5  |
| bilirubin | 16.516 ± 4.009   | 15.197 ± 3.981   | Mann-Whitney U | 0        | 7522775    |
| ima       | 81.624 ± 8.559   | 75.458 ± 12.891  | Mann-Whitney U | 0        | 4487861    |
| pt        | 13.822 ± 0.627   | 13.843 ± 1.151   | Mann-Whitney U | 0        | 8374380.5  |
| crp       | 55.681 ± 48.823  | 15.314 ± 18.865  | Mann-Whitney U | 0        | 3060302    |
| wbc       | 11.79 ± 3.084    | 8.316 ± 1.286    | Mann-Whitney U | 0        | 2667973    |
| age       | 65.335 ± 13.909  | 66.806 ± 12.597  | Mann-Whitney U | 0.013188 | 10386092   |
| hdl       | 1.246 ± 0.146    | 1.249 ± 0.149    | Mann-Whitney U | 0.619502 | 10008026   |
| lactate   | 2.825 ± 0.376    | 2.505 ± 0.411    | Mann-Whitney U | 0        | 4480425    |
| rbc       | 4.408 ± 0.274    | 4.304 ± 0.324    | Mann-Whitney U | 0        | 7811417    |
| ast       | 38.25 ± 18.205   | 26.05 ± 12.823   | Mann-Whitney U | 0        | 3814876    |
| plt       | 180.251 ± 36.939 | 190.132 ± 26.424 | Mann-Whitney U | 0        | 11826502.5 |
| alt       | 26.827 ± 10.349  | 24.193 ± 10.108  | Mann-Whitney U | 0        | 7632233.5  |

|            |                   |                   |                |          |            |
|------------|-------------------|-------------------|----------------|----------|------------|
| aptt       | 35.045 ± 1.881    | 35.702 ± 2.313    | Mann-Whitney U | 0        | 11737054.5 |
| ldh        | 296.455 ± 111.282 | 215.357 ± 75.036  | Mann-Whitney U | 0        | 5261997.5  |
| creatinine | 83.837 ± 24.574   | 85.199 ± 52.439   | Mann-Whitney U | 0        | 8567930.5  |
| hba1c      | 6.759 ± 1.048     | 6.662 ± 0.916     | Mann-Whitney U | 0.000035 | 9132523    |
| urea       | 6.33 ± 1.354      | 6.419 ± 1.438     | Mann-Whitney U | 0.001566 | 10515532   |
| ck         | 1029.594 ± 872.8  | 195.007 ± 273.212 | Mann-Whitney U | 0        | 3469376    |

Table 1. Single factor significant analysis results

| Feature | 0 (N=20789)      | 1 (N=954)        | OR (univariate)              | coef   | std err | z       | P >  z | [0.025 | 0.975] | Label_1 | Label_0 |
|---------|------------------|------------------|------------------------------|--------|---------|---------|--------|--------|--------|---------|---------|
| age     | 66.806 ± 12.597  | 65.335 ± 13.909  | 0.991 (0.986-0.996, p=0.0)   | -0.090 | 0.003   | -3.508  | 0.000  | -0.140 | -0.040 | -       | -       |
| plt     | 190.132 ± 26.424 | 180.251 ± 36.939 | 0.986 (0.983-0.988, p=0.0)   | -0.014 | 0.001   | -11.320 | 0.000  | -0.017 | -0.012 | -       | -       |
| wbc     | 8.316 ± 1.286    | 11.79 ± 3.084    | 2.23 (2.149-2.314, p=0.0)    | 0.802  | 0.019   | 42.306  | 0.000  | 0.765  | 0.839  | -       | -       |
| rbc     | 4.304 ± 0.324    | 4.408 ± 0.274    | 2.622 (2.162-3.177, p=0.0)   | 0.963  | 0.098   | 9.805   | 0.000  | 0.771  | 1.156  | -       | -       |
| hba1c   | 6.662 ± 0.916    | 6.759 ± 1.048    | 1.112 (1.042-1.186, p=0.001) | 0.105  | 0.033   | 3.176   | 0.001  | 0.041  | 0.171  | -       | -       |
| crp     | 15.314 ± 18.865  | 55.681 ± 48.823  | 1.033 (1.031-1.035,          | 0.032  | 0.001   | 36.79   | 0.000  | 0.031  | 0.034  | -       | -       |

|                |                         |                         |                    |            |           |           |         |           |           |   |   |  |
|----------------|-------------------------|-------------------------|--------------------|------------|-----------|-----------|---------|-----------|-----------|---|---|--|
|                |                         |                         | p=0.0)             |            |           | 2         | 0       |           |           |   |   |  |
|                |                         |                         | 1.617<br>(1.441-   |            |           |           | 0.      |           |           |   |   |  |
| tg             | 1.536 ±<br>0.433        | 1.662 ±<br>0.484        | 1.815,<br>p=0.0)   | 0.4<br>807 | 0.0<br>59 | 8.1<br>70 | 00<br>0 | 0.3<br>65 | 0.5<br>96 | - | - |  |
|                |                         |                         | 1.009<br>(0.843-   |            |           |           | 0.      | -         |           |   |   |  |
| ldl            | 2.685 ±<br>0.361        | 2.686 ±<br>0.372        | 1.207,<br>p=0.924) | 0.0<br>087 | 0.0<br>91 | 0.0<br>95 | 92<br>4 | 0.1<br>71 | 0.1<br>88 | - | - |  |
|                |                         |                         | 0.87 (0.562-       | -          |           | -         | 0.      | -         |           |   |   |  |
| hdl            | 1.249 ±<br>0.149        | 1.246 ±<br>0.146        | 1.349,<br>p=0.534) | 0.1<br>389 | 0.2<br>23 | 0.6<br>22 | 53<br>4 | 0.5<br>77 | 0.2<br>99 | - | - |  |
|                |                         |                         | 1.028<br>(1.024-   |            |           | 17.       | 0.      |           |           |   |   |  |
| ast            | 26.05 ±<br>12.823       | 38.25 ±<br>18.205       | 1.031,<br>p=0.0)   | 0.0<br>277 | 0.0<br>02 | 00<br>7   | 00<br>0 | 0.0<br>24 | 0.0<br>31 | - | - |  |
|                |                         |                         | 1.017<br>(1.012-   |            |           |           | 0.      |           |           |   |   |  |
| alt            | 24.193<br>±<br>10.108   | 26.827<br>±<br>10.349   | 1.021,<br>p=0.0)   | 0.0<br>169 | 0.0<br>02 | 7.5<br>07 | 00<br>0 | 0.0<br>12 | 0.0<br>21 | - | - |  |
|                |                         |                         | 1.068<br>(1.054-   |            |           |           | 0.      |           |           |   |   |  |
| bilirubin      | 15.197<br>± 3.981       | 16.516<br>± 4.009       | 1.082,<br>p=0.0)   | 0.0<br>662 | 0.0<br>07 | 9.8<br>26 | 00<br>0 | 0.0<br>53 | 0.0<br>79 | - | - |  |
|                |                         |                         | 0.971<br>(0.945-   | -          |           | -         | 0.      | -         | -         |   |   |  |
| albumin        | 40.886<br>± 2.257       | 40.734<br>± 2.37        | 0.999,<br>p=0.042) | 0.0<br>291 | 0.0<br>14 | 2.0<br>36 | 04<br>2 | 0.0<br>57 | 0.0<br>01 | - | - |  |
|                |                         |                         | 0.955 (0.91-       | -          |           | -         | 0.      | -         | -         |   |   |  |
| urea           | 6.419 ±<br>1.438        | 6.33 ±<br>1.354         | 1.002,<br>p=0.063) | 0.0<br>459 | 0.0<br>25 | 1.8<br>62 | 06<br>3 | 0.0<br>94 | 0.0<br>02 | - | - |  |
|                |                         |                         | 0.999<br>(0.998-   | -          |           | -         | 0.      | -         | -         |   |   |  |
| creatinin<br>e | 85.199<br>±<br>52.439   | 83.837<br>±<br>24.574   | 1.001,<br>p=0.425) | 0.0<br>006 | 0.0<br>01 | 0.7<br>98 | 42<br>5 | 0.0<br>02 | 0.0<br>01 | - | - |  |
|                |                         |                         | 1.0 (0.998-        | -          |           | -         | 0.      | -         | -         |   |   |  |
| bua            | 344.13<br>2 ±<br>58.336 | 342.52<br>1 ±<br>74.651 | 1.001,<br>p=0.411) | 0.0<br>005 | 0.0<br>01 | 0.8<br>22 | 41<br>1 | 0.0<br>02 | 0.0<br>01 | - | - |  |
|                |                         |                         | 0.982<br>(0.925-   | -          |           | -         | 0.      | -         | -         |   |   |  |
| pt             | 13.843<br>± 1.151       | 13.822<br>± 0.627       | 1.043,<br>p=0.564) | 0.0<br>177 | 0.0<br>31 | 0.5<br>77 | 56<br>4 | 0.0<br>78 | 0.0<br>42 | - | - |  |



|                            |                        |                      |                                        |     |     |     |    |     |     |                            |                               |
|----------------------------|------------------------|----------------------|----------------------------------------|-----|-----|-----|----|-----|-----|----------------------------|-------------------------------|
|                            | ± 1.225                | ± 1.025              | 1.025,<br>p=0.293)                     | 287 | 27  | 51  | 29 | 82  | 25  |                            |                               |
|                            |                        |                      | 1.342<br>(1.318-<br>1.368,<br>p=0.0)   | 0.2 | 0.0 | 30. | 0. |     |     |                            |                               |
| nihss                      | 7.886 ±<br>2.871       | 11.529<br>± 2.564    |                                        | 942 | 10  | 7   | 0  | 0.2 | 0.3 | -                          | -                             |
| uremia_<br>0               | 20618<br>(99.177<br>%) | 934<br>(97.904<br>%) | -                                      | -   | -   | -   | -  | -   | -   | 4.334%<br>(934 /<br>21552) | 95.666%<br>(20618 /<br>21552) |
| uremia_<br>1               | 171<br>(0.823<br>%)    | 20<br>(2.096<br>%)   | 2.582<br>(1.618-<br>4.121,<br>p=0.0)   | 0.9 | 0.2 | 3.9 | 0  | 0.4 | 1.4 | 10.471%<br>(20 /<br>191)   | 89.529%<br>(171 /<br>191)     |
| dvt_0                      | 19534<br>(93.963<br>%) | 847<br>(88.784<br>%) | -                                      | -   | -   | -   | -  | -   | -   | 4.156%<br>(847 /<br>20381) | 95.844%<br>(19534 /<br>20381) |
| dvt_1                      | 1255<br>(6.037<br>%)   | 107<br>(11.216<br>%) | 1.966<br>(1.595-<br>2.423,<br>p=0.0)   | 0.6 | 0.1 | 6.3 | 0  | 0.4 | 0.8 | 7.856%<br>(107 /<br>1362)  | 92.144%<br>(1255 /<br>1362)   |
| fatty_live<br>r_0          | 16655<br>(80.114<br>%) | 812<br>(85.115<br>%) | -                                      | -   | -   | -   | -  | -   | -   | 4.649%<br>(812 /<br>17467) | 95.351%<br>(16655 /<br>17467) |
| fatty_live<br>r_1          | 4134<br>(19.886<br>%)  | 142<br>(14.885<br>%) | 0.705<br>(0.587-<br>0.845,<br>p=0.0)   | 0.3 | 0.0 | 3.7 | 0  | 0.5 | 0.1 | 3.321%<br>(142 /<br>4276)  | 96.679%<br>(4134 /<br>4276)   |
| diabetes<br>_0             | 13737<br>(66.078<br>%) | 617<br>(64.675<br>%) | -                                      | -   | -   | -   | -  | -   | -   | 4.298%<br>(617 /<br>14354) | 95.702%<br>(13737 /<br>14354) |
| diabetes<br>_1             | 7052<br>(33.922<br>%)  | 337<br>(35.325<br>%) | 1.064<br>(0.929-<br>1.219,<br>p=0.371) | 0.0 | 0.0 | 0.8 | 0. | -   | 0.1 | 4.561%<br>(337 /<br>7389)  | 95.439%<br>(7052 /<br>7389)   |
| hyperten<br>sion_0         | 6497<br>(31.252<br>%)  | 290<br>(30.398<br>%) | -                                      | -   | -   | -   | -  | -   | -   | 4.273%<br>(290 /<br>6787)  | 95.727%<br>(6497 /<br>6787)   |
| hyperten<br>sion_1         | 14292<br>(68.748<br>%) | 664<br>(69.602<br>%) | 1.041<br>(0.904-<br>1.198,<br>p=0.578) | 0.0 | 0.0 | 0.5 | 0. | -   | 0.1 | 4.44%<br>(664 /<br>14956)  | 95.56%<br>(14292 /<br>14956)  |
| coronary<br>_disease<br>_0 | 11288<br>(54.298<br>%) | 599<br>(62.788<br>%) | -                                      | -   | -   | -   | -  | -   | -   | 5.039%<br>(599 /<br>11887) | 94.961%<br>(11288 /<br>11887) |

|                       |                 |               |                              |        |        |       |       |       |       |       |                      |                         |
|-----------------------|-----------------|---------------|------------------------------|--------|--------|-------|-------|-------|-------|-------|----------------------|-------------------------|
| coronary_disease_1    | 9501 (45.702%)  | 355 (37.212%) | 0.704 (0.616-0.805, p=0.0)   | -      | 0.3508 | 0.068 | 5.128 | 0.00  | -     | -     | 3.602% (355 / 9856)  | 96.398% (9501 / 9856)   |
| atrial_fibrillation_0 | 18811 (90.485%) | 838 (87.841%) | -                            | -      | -      | -     | -     | -     | -     | -     | 4.265% (838 / 19649) | 95.735% (18811 / 19649) |
| atrial_fibrillation_1 | 1978 (9.515%)   | 116 (12.159%) | 1.316 (1.078-1.608, p=0.007) | 0.2749 | 0.102  | 2.699 | 0.007 | 0.075 | 0.475 | 0.475 | 5.54% (116 / 2094)   | 94.46% (1978 / 2094)    |
| hyperuricemia_0       | 18547 (89.215%) | 801 (83.962%) | -                            | -      | -      | -     | -     | -     | -     | -     | 4.14% (801 / 19348)  | 95.86% (18547 / 19348)  |
| hyperuricemia_1       | 2242 (10.785%)  | 153 (16.038%) | 1.58 (1.322-1.889, p=0.0)    | 0.4575 | 0.091  | 5.027 | 0.000 | 0.279 | 0.636 | 0.636 | 6.388% (153 / 2395)  | 93.612% (2242 / 2395)   |
| hyperlipidaemia_0     | 16439 (79.075%) | 801 (83.962%) | -                            | -      | -      | -     | -     | -     | -     | -     | 4.646% (801 / 17240) | 95.354% (16439 / 17240) |
| hyperlipidaemia_1     | 4350 (20.925%)  | 153 (16.038%) | 0.722 (0.605-0.861, p=0.0)   | 0.3259 | 0.090  | 3.627 | 0.000 | 0.502 | 0.150 | 0.150 | 3.398% (153 / 4503)  | 96.602% (4350 / 4503)   |
| hypoproteinemia_0     | 18479 (88.888%) | 774 (81.132%) | -                            | -      | -      | -     | -     | -     | -     | -     | 4.02% (774 / 19253)  | 95.98% (18479 / 19253)  |
| hypoproteinemia_1     | 2310 (11.112%)  | 180 (18.868%) | 1.86 (1.573-2.201, p=0.0)    | 0.6208 | 0.086  | 7.248 | 0.000 | 0.453 | 0.789 | 0.789 | 7.229% (180 / 2490)  | 92.771% (2310 / 2490)   |
| cerebral_hernia_0     | 20626 (99.216%) | 934 (97.904%) | -                            | -      | -      | -     | -     | -     | -     | -     | 4.332% (934 / 21560) | 95.668% (20626 / 21560) |
| cerebral_hernia_1     | 163 (0.784%)    | 20 (2.096%)   | 2.71 (1.696-4.332, p=0.0)    | 0.9968 | 0.239  | 4.166 | 0.000 | 0.528 | 1.466 | 1.466 | 10.929% (20 / 183)   | 89.071% (163 / 183)     |
| hydrocephalus_0       | 20565 (98.923%) | 895 (93.816%) | -                            | -      | -      | -     | -     | -     | -     | -     | 4.171% (895 / 21460) | 95.829% (20565 / 21460) |
| hydrocephalus_1       | 224 (1.077%)    | 59 (6.184%)   | 6.052 (4.509-8.125, p=0.0)   | 1.8004 | 0.150  | 11.98 | 0.000 | 1.506 | 2.095 | 2.095 | 20.848% (59 / 283)   | 79.152% (224 / 283)     |

|                      |                        |                      |                                      |            |           |           |           |                |           |   |                            |                               |
|----------------------|------------------------|----------------------|--------------------------------------|------------|-----------|-----------|-----------|----------------|-----------|---|----------------------------|-------------------------------|
|                      |                        |                      | p=0.0)                               |            |           |           | 2         | 0              |           |   |                            |                               |
| frontal_lo<br>be_0   | 19943<br>(95.931<br>%) | 868<br>(90.985<br>%) | -                                    | -          | -         | -         | -         | -              | -         | - | 4.171%<br>(868 /<br>20811) | 95.829%<br>(19943 /<br>20811) |
| frontal_lo<br>be_1   | 846<br>(4.069<br>%)    | 86<br>(9.015<br>%)   | 2.336<br>(1.852-<br>2.945,<br>p=0.0) | 0.8<br>483 | 0.1<br>18 | 7.1<br>66 | 0.00<br>0 | 0.6<br>16      | 1.0<br>80 |   | 9.227%<br>(86 /<br>932)    | 90.773%<br>(846 /<br>932)     |
| parietal_l<br>obe_0  | 20180<br>(97.071<br>%) | 884<br>(92.662<br>%) | -                                    | -          | -         | -         | -         | -              | -         | - | 4.197%<br>(884 /<br>21064) | 95.803%<br>(20180 /<br>21064) |
| parietal_l<br>obe_1  | 609<br>(2.929<br>%)    | 70<br>(7.338<br>%)   | 2.624 (2.03-<br>3.391,<br>p=0.0)     | 0.9<br>647 | 0.1<br>31 | 7.3<br>75 | 0.00<br>0 | 0.7<br>08      | 1.2<br>21 |   | 10.309%<br>(70 /<br>679)   | 89.691%<br>(609 /<br>679)     |
| temporal<br>_lobe_0  | 20209<br>(97.21<br>%)  | 886<br>(92.872<br>%) | -                                    | -          | -         | -         | -         | -              | -         | - | 4.2%<br>(886 /<br>21095)   | 95.8%<br>(20209 /<br>21095)   |
| temporal<br>_lobe_1  | 580<br>(2.79%)         | 68<br>(7.128<br>%)   | 2.674<br>(2.063-<br>3.469,<br>p=0.0) | 0.9<br>836 | 0.1<br>33 | 7.4<br>13 | 0.00<br>0 | 0.7<br>24      | 1.2<br>44 |   | 10.494%<br>(68 /<br>648)   | 89.506%<br>(580 /<br>648)     |
| occipital<br>_lobe_0 | 20422<br>(98.235<br>%) | 919<br>(96.331<br>%) | -                                    | -          | -         | -         | -         | -              | -         | - | 4.306%<br>(919 /<br>21341) | 95.694%<br>(20422 /<br>21341) |
| occipital<br>_lobe_1 | 367<br>(1.765<br>%)    | 35<br>(3.669<br>%)   | 2.119<br>(1.489-<br>3.016,<br>p=0.0) | 0.7<br>511 | 0.1<br>80 | 4.1<br>70 | 0.00<br>0 | 0.3<br>98      | 1.1<br>04 |   | 8.706%<br>(35 /<br>402)    | 91.294%<br>(367 /<br>402)     |
| insular_l<br>obe_0   | 20519<br>(98.701<br>%) | 938<br>(98.323<br>%) | -                                    | -          | -         | -         | -         | -              | -         | - | 4.372%<br>(938 /<br>21457) | 95.628%<br>(20519 /<br>21457) |
| insular_l<br>obe_1   | 270<br>(1.299<br>%)    | 16<br>(1.677<br>%)   | 1.296 (0.78-<br>2.155,<br>p=0.317)   | 0.2<br>595 | 0.2<br>59 | 1.0<br>00 | 0.31<br>7 | -<br>0.2<br>49 | 0.7<br>68 |   | 5.594%<br>(16 /<br>286)    | 94.406%<br>(270 /<br>286)     |
| range_lo<br>be_0     | 19559<br>(94.083<br>%) | 830<br>(87.002<br>%) | -                                    | -          | -         | -         | -         | -              | -         | - | 4.071%<br>(830 /<br>20389) | 95.929%<br>(19559 /<br>20389) |
| range_lo<br>be_1     | 467<br>(2.246<br>%)    | 43<br>(4.507<br>%)   | 2.17 (1.576-<br>2.989,<br>p=0.0)     | 0.7<br>746 | 0.1<br>63 | 4.7<br>45 | 0.00<br>0 | 0.4<br>55      | 1.0<br>95 |   | 8.431%<br>(43 /<br>510)    | 91.569%<br>(467 /<br>510)     |
| range_lo             | 329<br>(1.583          | 32<br>(3.354         | 2.292<br>(1.584-                     | 0.8        | 0.1       | 4.3       | 0.0       | 0.4            | 1.1       |   | 8.864%<br>(32 /            | 91.136%<br>(329 /             |



|                             |                        |                      |                                        |            |           |           |          |           |           |                            |                               |
|-----------------------------|------------------------|----------------------|----------------------------------------|------------|-----------|-----------|----------|-----------|-----------|----------------------------|-------------------------------|
| be_2                        | %)                     | %)                   | 3.317,<br>p=0.0)                       | 294        | 89        | 99        | 00       | 60        | 99        | 361)                       | 361)                          |
| range_lo<br>be_3            | 224<br>(1.077<br>%)    | 31<br>(3.249<br>%)   | 3.261<br>(2.226-<br>4.778,<br>p=0.0)   | 1.1<br>821 | 0.1<br>95 | 6.0<br>66 | 0.<br>00 | 0.8<br>00 | 1.5<br>64 | 12.157%<br>(31 /<br>255)   | 87.843%<br>(224 /<br>255)     |
| range_lo<br>be_4            | 175<br>(0.842<br>%)    | 15<br>(1.572<br>%)   | 2.02 (1.186-<br>3.438,<br>p=0.01)      | 0.7<br>030 | 0.2<br>71 | 2.5<br>91 | 0.<br>01 | 0.1<br>71 | 1.2<br>35 | 7.895%<br>(15 /<br>190)    | 92.105%<br>(175 /<br>190)     |
| range_lo<br>be_5            | 35<br>(0.168<br>%)     | 3<br>(0.314<br>%)    | 2.02 (0.62-<br>6.58,<br>p=0.243)       | 0.7<br>030 | 0.6<br>03 | 1.1<br>67 | 0.<br>24 | -<br>0.4  | 1.8<br>84 | 7.895%<br>(3 / 38)         | 92.105%<br>(35 / 38)          |
| basal_ga<br>nglia_0         | 19869<br>(95.575<br>%) | 893<br>(93.606<br>%) | -                                      | -          | -         | -         | -        | -         | -         | 4.301%<br>(893 /<br>20762) | 95.699%<br>(19869 /<br>20762) |
| basal_ga<br>nglia_1         | 920<br>(4.425<br>%)    | 61<br>(6.394<br>%)   | 1.475<br>(1.129-<br>1.927,<br>p=0.004) | 0.3<br>888 | 0.1<br>37 | 2.8<br>47 | 0.<br>00 | 0.1<br>21 | 0.6<br>56 | 6.218%<br>(61 /<br>981)    | 93.782%<br>(920 /<br>981)     |
| brainste<br>m_0             | 20532<br>(98.764<br>%) | 938<br>(98.323<br>%) | -                                      | -          | -         | -         | -        | -         | -         | 4.369%<br>(938 /<br>21470) | 95.631%<br>(20532 /<br>21470) |
| brainste<br>m_1             | 257<br>(1.236<br>%)    | 16<br>(1.677<br>%)   | 1.363<br>(0.819-<br>2.268,<br>p=0.234) | 0.3<br>095 | 0.2<br>60 | 1.1<br>91 | 0.<br>23 | -<br>0.2  | 0.8<br>19 | 5.861%<br>(16 /<br>273)    | 94.139%<br>(257 /<br>273)     |
| epencep<br>halon_0          | 20362<br>(97.946<br>%) | 934<br>(97.904<br>%) | -                                      | -          | -         | -         | -        | -         | -         | 4.386%<br>(934 /<br>21296) | 95.614%<br>(20362 /<br>21296) |
| epencep<br>halon_1          | 427<br>(2.054<br>%)    | 20<br>(2.096<br>%)   | 1.021<br>(0.649-<br>1.606,<br>p=0.928) | 0.0<br>209 | 0.2<br>31 | 0.0<br>90 | 0.<br>92 | -<br>0.4  | 0.4<br>74 | 4.474%<br>(20 /<br>447)    | 95.526%<br>(427 /<br>447)     |
| paravent<br>ricular_0       | 19786<br>(95.175<br>%) | 899<br>(94.235<br>%) | -                                      | -          | -         | -         | -        | -         | -         | 4.346%<br>(899 /<br>20685) | 95.654%<br>(19786 /<br>20685) |
| paravent<br>ricular_1       | 1003<br>(4.825<br>%)   | 55<br>(5.765<br>%)   | 1.207<br>(0.912-<br>1.597,<br>p=0.187) | 0.1<br>880 | 0.1<br>43 | 1.3<br>18 | 0.<br>18 | -<br>0.0  | 0.4<br>68 | 5.198%<br>(55 /<br>1058)   | 94.802%<br>(1003 /<br>1058)   |
| centrum<br>_semiov<br>ale_0 | 20207<br>(97.2%)       | 922<br>(96.646<br>%) | -                                      | -          | -         | -         | -        | -         | -         | 4.364%<br>(922 /<br>21129) | 95.636%<br>(20207 /<br>21129) |

|                             |                        |                      |                                        |            |           |           |          |           |           |                            |                               |
|-----------------------------|------------------------|----------------------|----------------------------------------|------------|-----------|-----------|----------|-----------|-----------|----------------------------|-------------------------------|
| centrum<br>_semiov<br>ale_1 | 582<br>(2.8%)          | 32<br>(3.354<br>%)   | 1.205<br>(0.839-1.73,<br>p=0.313)      | 0.1<br>865 | 0.1<br>85 | 1.0<br>10 | 0.<br>31 | -<br>0.1  | 0.5<br>48 | 5.212%<br>(32 /<br>614)    | 94.788%<br>(582 /<br>614)     |
| thalamus<br>_0              | 20565<br>(98.923<br>%) | 937<br>(98.218<br>%) | -                                      | -          | -         | -         | -        | -         | -         | 4.358%<br>(937 /<br>21502) | 95.642%<br>(20565 /<br>21502) |
| thalamus<br>_1              | 224<br>(1.077<br>%)    | 17<br>(1.782<br>%)   | 1.666<br>(1.013-2.74,<br>p=0.044)      | 0.5<br>102 | 0.2<br>54 | 2.0<br>11 | 0.<br>04 | 0.0<br>13 | 1.0<br>08 | 7.054%<br>(17 /<br>241)    | 92.946%<br>(224 /<br>241)     |
| aca_0                       | 20524<br>(98.725<br>%) | 941<br>(98.637<br>%) | -                                      | -          | -         | -         | -        | -         | -         | 4.384%<br>(941 /<br>21465) | 95.616%<br>(20524 /<br>21465) |
| aca_1                       | 265<br>(1.275<br>%)    | 13<br>(1.363<br>%)   | 1.07 (0.611-<br>1.874,<br>p=0.813)     | 0.0<br>676 | 0.2<br>86 | 0.2<br>36 | 0.<br>81 | -<br>0.4  | 0.6<br>28 | 4.676%<br>(13 /<br>278)    | 95.324%<br>(265 /<br>278)     |
| mca_0                       | 19998<br>(96.195<br>%) | 912<br>(95.597<br>%) | -                                      | -          | -         | -         | -        | -         | -         | 4.362%<br>(912 /<br>20910) | 95.638%<br>(19998 /<br>20910) |
| mca_1                       | 791<br>(3.805<br>%)    | 42<br>(4.403<br>%)   | 1.164<br>(0.848-<br>1.598,<br>p=0.348) | 0.1<br>521 | 0.1<br>62 | 0.9<br>39 | 0.<br>34 | -<br>0.1  | 0.4<br>69 | 5.042%<br>(42 /<br>833)    | 94.958%<br>(791 /<br>833)     |
| pca_0                       | 20729<br>(99.711<br>%) | 952<br>(99.79<br>%)  | -                                      | -          | -         | -         | -        | -         | -         | 4.391%<br>(952 /<br>21681) | 95.609%<br>(20729 /<br>21681) |
| pca_1                       | 60<br>(0.289<br>%)     | 2<br>(0.21%)         | 0.726<br>(0.177-<br>2.974,<br>p=0.656) | 0.3<br>205 | 0.7<br>20 | 0.4<br>45 | 0.<br>65 | -<br>1.7  | 1.0<br>90 | 3.226%<br>(2 / 62)         | 96.774%<br>(60 / 62)          |
| va_0                        | 20159<br>(96.97<br>%)  | 927<br>(97.17<br>%)  | -                                      | -          | -         | -         | -        | -         | -         | 4.396%<br>(927 /<br>21086) | 95.604%<br>(20159 /<br>21086) |
| va_1                        | 630<br>(3.03%)         | 27<br>(2.83%)        | 0.932<br>(0.631-<br>1.377,<br>p=0.724) | 0.0<br>704 | 0.1<br>99 | 0.3<br>53 | 0.<br>72 | -<br>0.4  | 0.3<br>20 | 4.11%<br>(27 /<br>657)     | 95.89%<br>(630 /<br>657)      |
| ba_0                        | 20605<br>(99.115<br>%) | 945<br>(99.057<br>%) | -                                      | -          | -         | -         | -        | -         | -         | 4.385%<br>(945 /<br>21550) | 95.615%<br>(20605 /<br>21550) |
| ba_1                        | 184<br>(0.885<br>%)    | 9<br>(0.943<br>%)    | 1.067<br>(0.544-2.09,<br>p=0.851)      | 0.0<br>644 | 0.3<br>43 | 0.1<br>88 | -<br>0.  | -<br>0.6  | 0.7<br>37 | 4.663%<br>(9 / 193)        | 95.337%<br>(184 /<br>193)     |

1

|                  |                    |                  |                                    |            |           |           |          |           |           |                         |                            |
|------------------|--------------------|------------------|------------------------------------|------------|-----------|-----------|----------|-----------|-----------|-------------------------|----------------------------|
| gender_0         | 10407<br>(50.06%)  | 372<br>(38.994%) | -                                  | -          | -         | -         | -        | -         | -         | 3.451%<br>(372 / 10779) | 96.549%<br>(10407 / 10779) |
| gender_1         | 10382<br>(49.94%)  | 582<br>(61.006%) | 1.568<br>(1.373-1.791,<br>p=0.0)   | 0.4<br>500 | 0.0<br>68 | 6.6<br>35 | 0.0<br>0 | 0.3<br>17 | 0.5<br>83 | 5.308%<br>(582 / 10964) | 94.692%<br>(10382 / 10964) |
| cca_plaque_0     | 16100<br>(77.445%) | 751<br>(78.721%) | -                                  | -          | -         | -         | -        | -         | -         | 4.457%<br>(751 / 16851) | 95.543%<br>(16100 / 16851) |
| cca_plaque_1     | 4689<br>(22.555%)  | 203<br>(21.279%) | 0.928<br>(0.792-1.088,<br>p=0.356) | 0.0<br>746 | 0.0<br>81 | 0.9<br>23 | 0.0<br>6 | 0.2<br>33 | 0.0<br>84 | 4.15%<br>(203 / 4892)   | 95.85%<br>(4689 / 4892)    |
| ica_plaque_0     | 19392<br>(93.28%)  | 878<br>(92.034%) | -                                  | -          | -         | -         | -        | -         | -         | 4.332%<br>(878 / 20270) | 95.668%<br>(19392 / 20270) |
| ica_plaque_1     | 1397<br>(6.72%)    | 76<br>(7.966%)   | 1.202<br>(0.945-1.528,<br>p=0.135) | 0.1<br>836 | 0.1<br>23 | 1.4<br>96 | 0.0<br>5 | -<br>57   | 0.4<br>24 | 5.16%<br>(76 / 1473)    | 94.84%<br>(1397 / 1473)    |
| eca_plaque_0     | 20591<br>(99.048%) | 942<br>(98.742%) | -                                  | -          | -         | -         | -        | -         | -         | 4.375%<br>(942 / 21533) | 95.625%<br>(20591 / 21533) |
| eca_plaque_1     | 198<br>(0.952%)    | 12<br>(1.258%)   | 1.325<br>(0.737-2.382,<br>p=0.347) | 0.2<br>812 | 0.2<br>99 | 0.9<br>40 | 0.0<br>7 | -<br>05   | 0.8<br>68 | 5.714%<br>(12 / 210)    | 94.286%<br>(198 / 210)     |
| subcortex_lobe_0 | 18454<br>(88.768%) | 814<br>(85.325%) | -                                  | -          | -         | -         | -        | -         | -         | 4.225%<br>(814 / 19268) | 95.775%<br>(18454 / 19268) |
| subcortex_lobe_1 | 2335<br>(11.232%)  | 140<br>(14.675%) | 1.359<br>(1.131-1.634,<br>p=0.001) | 0.3<br>070 | 0.0<br>94 | 3.2<br>62 | 0.0<br>1 | 0.1<br>23 | 0.4<br>91 | 5.657%<br>(140 / 2475)  | 94.343%<br>(2335 / 2475)   |

Table 2. Univariable logistic regression results

| Feature | 0<br>(N=20789) | 1<br>(N=954) | OR<br>(multivariable) | Coef | Std. Er | z | P> z | [0.025 | 0.975] |
|---------|----------------|--------------|-----------------------|------|---------|---|------|--------|--------|
|---------|----------------|--------------|-----------------------|------|---------|---|------|--------|--------|

|     |                     |                         |                                     |                |       |                 |           |            |                |
|-----|---------------------|-------------------------|-------------------------------------|----------------|-------|-----------------|-----------|------------|----------------|
| tg  | 1.536 ±<br>0.433    | 1.662 ±<br>0.484        | 2.458 (2.069-<br>2.92, p=0.0)       | 0.89<br>9      | 0.088 | 10.23           | 0         | 0.727      | 1.07<br>1      |
| rbc | 4.304 ±<br>0.324    | 4.408 ±<br>0.274        | 4.731 (3.274-<br>6.837, p=0.0)      | 1.55<br>4      | 0.188 | 8.275           | 0         | 1.186      | 1.92<br>2      |
| age | 66.806 ±<br>12.597  | 65.335<br>±<br>13.909   | 1.012 (1.004-<br>1.021,<br>p=0.003) | 0.01<br>2      | 0.004 | 2.971           | 0.00<br>3 | 0.004      | 0.02<br>1      |
| ast | 26.05 ±<br>12.823   | 38.25 ±<br>18.205       | 1.048 (1.04-<br>1.055, p=0.0)       | 0.04<br>6      | 0.004 | 12.41<br>3      | 0         | 0.039      | 0.05<br>4      |
| plt | 190.132<br>± 26.424 | 180.251<br>±<br>36.939  | 0.977 (0.973-<br>0.98, p=0.0)       | -<br>0.02<br>4 | 0.002 | -<br>13.37<br>5 | 0         | -<br>0.027 | -<br>-0.02     |
| alt | 24.193 ±<br>10.108  | 26.827<br>±<br>10.349   | 0.953 (0.942-<br>0.964, p=0.0)      | -<br>0.04<br>8 | 0.006 | -<br>8.177      | 0         | -<br>0.059 | -<br>0.03<br>6 |
| ima | 75.458 ±<br>12.891  | 81.624<br>± 8.559       | 1.006 (1.001-<br>1.012,<br>p=0.014) | 0.00<br>6      | 0.003 | 2.453           | 0.01<br>4 | 0.001      | 0.01<br>2      |
| ldh | 215.357<br>± 75.036 | 296.455<br>±<br>111.282 | 0.984 (0.982-<br>0.987, p=0.0)      | -<br>0.01<br>6 | 0.001 | -<br>12.99<br>2 | 0         | -<br>0.018 | -<br>0.01<br>4 |
| tt  | 16.432 ±<br>0.615   | 16.636<br>± 0.809       | 1.13 (1.009-<br>1.265,<br>p=0.034)  | 0.12<br>2      | 0.058 | 2.116           | 0.03<br>4 | 0.009      | 0.23<br>5      |
| crp | 15.314 ±<br>18.865  | 55.681<br>±<br>48.823   | 1.032 (1.028-<br>1.036, p=0.0)      | 0.03<br>1      | 0.002 | 15.58<br>5      | 0         | 0.027      | 0.03<br>5      |
| wbc | 8.316 ±<br>1.286    | 11.79 ±<br>3.084        | 2.091 (1.985-<br>2.204, p=0.0)      | 0.73<br>8      | 0.027 | 27.58<br>3      | 0         | 0.685      | 0.79           |

|                   |                         |                         |                                      |                |       |            |           |            |           |
|-------------------|-------------------------|-------------------------|--------------------------------------|----------------|-------|------------|-----------|------------|-----------|
| ck                | 195.007<br>±<br>273.212 | 1029.59<br>4 ±<br>872.8 | 1.001 (1.001-<br>1.001, p=0.0)       | 0.00<br>1      | 0     | 7.86       | 0         | 0.001      | 0.00<br>1 |
| subcortex_lobe_0  | 18454<br>(88.768<br>%)  | 814<br>(85.325<br>%)    | -                                    | -              | -     | -          | -         | -          | -         |
| subcortex_lobe_1  | 2335<br>(11.232<br>%)   | 140<br>(14.675<br>%)    | 1.188 (0.827-<br>1.707 ,p=0.35<br>2) | 0.17<br>2      | 0.185 | 0.93       | 0.35<br>2 | -<br>0.191 | 0.53<br>5 |
| frontal_lobe_0    | 19943<br>(95.931<br>%)  | 868<br>(90.985<br>%)    | -                                    | -              | -     | -          | -         | -          | -         |
| frontal_lobe_1    | 846<br>(4.069%<br>)     | 86<br>(9.015%<br>)      | 4.577 (1.381-<br>15.17 ,p=0.01<br>3) | 1.52<br>1      | 0.611 | 2.488      | 0.01<br>3 | 0.323      | 2.71<br>9 |
| cerebral_hernia_0 | 20626<br>(99.216<br>%)  | 934<br>(97.904<br>%)    | -                                    | -              | -     | -          | -         | -          | -         |
| cerebral_hernia_1 | 163<br>(0.784%<br>)     | 20<br>(2.096%<br>)      | 0.846 (0.387-<br>1.85 ,p=0.676<br>)  | -<br>0.16<br>7 | 0.399 | -<br>0.418 | 0.67<br>6 | -<br>0.949 | 0.61<br>5 |
| thalamus_0        | 20565<br>(98.923<br>%)  | 937<br>(98.218<br>%)    | -                                    | -              | -     | -          | -         | -          | -         |
| thalamus_1        | 224<br>(1.077%<br>)     | 17<br>(1.782%<br>)      | 0.669 (0.327-<br>1.373 ,p=0.27<br>3) | -<br>0.40<br>1 | 0.366 | -<br>1.095 | 0.27<br>3 | -<br>1.119 | 0.31<br>7 |
| occipital_lobe_0  | 20422<br>(98.235<br>%)  | 919<br>(96.331<br>%)    | -                                    | -              | -     | -          | -         | -          | -         |

|                        |                    |                  |                                   |                |       |            |           |            |           |
|------------------------|--------------------|------------------|-----------------------------------|----------------|-------|------------|-----------|------------|-----------|
| occipital_lobe_1       | 367<br>(1.765%)    | 35<br>(3.669%)   | 2.172 (0.741-<br>6.368 ,p=0.157)  | 0.77<br>6      | 0.549 | 1.414      | 0.15<br>7 | -0.3       | 1.85<br>1 |
| coronary_diseas<br>e_0 | 11288<br>(54.298%) | 599<br>(62.788%) | -                                 | -              | -     | -          | -         | -          | -         |
| coronary_diseas<br>e_1 | 9501<br>(45.702%)  | 355<br>(37.212%) | 1.408 (1.151-<br>1.724 ,p=0.001)  | 0.34<br>2      | 0.103 | 3.322      | 0.00<br>1 | 0.14       | 0.54<br>5 |
| hypoproteinemia<br>_0  | 18479<br>(88.888%) | 774<br>(81.132%) | -                                 | -              | -     | -          | -         | -          | -         |
| hypoproteinemia<br>_1  | 2310<br>(11.112%)  | 180<br>(18.868%) | 1.183 (0.9-<br>1.554 ,p=0.228)    | 0.16<br>8      | 0.139 | 1.206      | 0.22<br>8 | -<br>0.105 | 0.44<br>1 |
| parietal_lobe_0        | 20180<br>(97.071%) | 884<br>(92.662%) | -                                 | -              | -     | -          | -         | -          | -         |
| parietal_lobe_1        | 609<br>(2.929%)    | 70<br>(7.338%)   | 6.939 (2.253-<br>21.375 ,p=0.001) | 1.93<br>7      | 0.574 | 3.375      | 0.00<br>1 | 0.812      | 3.06<br>2 |
| hyperuricemia_0        | 18547<br>(89.215%) | 801<br>(83.962%) | -                                 | -              | -     | -          | -         | -          | -         |
| hyperuricemia_1        | 2242<br>(10.785%)  | 153<br>(16.038%) | 0.938 (0.691-<br>1.275 ,p=0.684)  | -<br>0.06<br>4 | 0.156 | -<br>0.407 | 0.68<br>4 | -0.37      | 0.24<br>3 |
| temporal_lobe_0        | 20209<br>(97.21%)  | 886<br>(92.872%) | -                                 | -              | -     | -          | -         | -          | -         |

|                 |                    |                  |                                   |                |       |            |           |                 |                |
|-----------------|--------------------|------------------|-----------------------------------|----------------|-------|------------|-----------|-----------------|----------------|
| temporal_lobe_1 | 580<br>(2.79%)     | 68<br>(7.128%)   | 5.242 (1.548-<br>17.752 ,p=0.008) | 1.65<br>7      | 0.622 | 2.662      | 0.00<br>8 | 0.437           | 2.87<br>6      |
| range_lobe_0    | 19559<br>(94.083%) | 830<br>(87.002%) | -                                 | -              | -     | -          | -         | -               | -              |
| range_lobe_1    | 467<br>(2.246%)    | 43<br>(4.507%)   | 0.359 (0.111-<br>1.159 ,p=0.087)  | -<br>1.02<br>5 | 0.598 | -<br>1.713 | 0.08<br>7 | -<br>2.197      | 0.14<br>7      |
| range_lobe_2    | 329<br>(1.583%)    | 32<br>(3.354%)   | 0.084 (0.01-<br>0.703 ,p=0.022)   | -<br>2.47<br>9 | 1.085 | -<br>2.285 | 0.02<br>2 | -<br>4.605      | -<br>0.35<br>2 |
| range_lobe_3    | 224<br>(1.077%)    | 31<br>(3.249%)   | 0.011 (0.0-<br>0.231 ,p=0.004)    | -<br>4.54<br>2 | 1.569 | -<br>2.895 | 0.00<br>4 | -<br>7.617      | -<br>1.46<br>7 |
| range_lobe_4    | 175<br>(0.842%)    | 15<br>(1.572%)   | 0.001 (0.0-<br>0.057 ,p=0.001)    | -<br>6.66<br>6 | 1.943 | -3.43      | 0.00<br>1 | -<br>10.47<br>5 | -<br>2.85<br>7 |
| range_lobe_5    | 35<br>(0.168%)     | 3<br>(0.314%)    | 0.001 (0.0-<br>0.115 ,p=0.004)    | -<br>6.58<br>6 | 2.259 | -<br>2.915 | 0.00<br>4 | -<br>11.01<br>4 | -<br>2.15<br>9 |
| hydrocephalus_0 | 20565<br>(98.923%) | 895<br>(93.816%) | -                                 | -              | -     | -          | -         | -               | -              |
| hydrocephalus_1 | 224<br>(1.077%)    | 59<br>(6.184%)   | 3.251 (1.939-<br>5.451 ,p=0.0)    | 1.17<br>9      | 0.264 | 4.471      | 0         | 0.662           | 1.69<br>6      |
| gender_0        | 10407<br>(50.06%)  | 372<br>(38.994%) | -                                 | -              | -     | -          | -         | -               | -              |

|                       |                    |                  |                                      |                |       |            |           |            |                |
|-----------------------|--------------------|------------------|--------------------------------------|----------------|-------|------------|-----------|------------|----------------|
| gender_1              | 10382<br>(49.94%)  | 582<br>(61.006%) | 0.572 (0.454-<br>0.72 ,p=0.0)        | -<br>0.55<br>8 | 0.117 | -<br>4.753 | 0         | -<br>0.789 | -<br>0.32<br>8 |
| uremia_0              | 20618<br>(99.177%) | 934<br>(97.904%) | -                                    | -              | -     | -          | -         | -          | -              |
| uremia_1              | 171<br>(0.823%)    | 20<br>(2.096%)   | 1.979 (1.098-<br>3.564 ,p=0.02<br>3) | 0.68<br>2      | 0.3   | 2.273      | 0.02<br>3 | 0.094      | 1.27<br>1      |
| atrial_fibrillation_0 | 18811<br>(90.485%) | 838<br>(87.841%) | -                                    | -              | -     | -          | -         | -          | -              |
| atrial_fibrillation_1 | 1978<br>(9.515%)   | 116<br>(12.159%) | 1.446 (1.087-<br>1.923 ,p=0.01<br>1) | 0.36<br>9      | 0.145 | 2.534      | 0.01<br>1 | 0.084      | 0.65<br>4      |
| basal_ganglia_0       | 19869<br>(95.575%) | 893<br>(93.606%) | -                                    | -              | -     | -          | -         | -          | -              |
| basal_ganglia_1       | 920<br>(4.425%)    | 61<br>(6.394%)   | 1.024 (0.642-<br>1.633 ,p=0.92<br>1) | 0.02<br>4      | 0.238 | 0.099      | 0.92<br>1 | -<br>0.443 | 0.49           |
| dvt_0                 | 19534<br>(93.963%) | 847<br>(88.784%) | -                                    | -              | -     | -          | -         | -          | -              |
| dvt_1                 | 1255<br>(6.037%)   | 107<br>(11.216%) | 1.254 (0.922-<br>1.706 ,p=0.14<br>9) | 0.22<br>7      | 0.157 | 1.443      | 0.14<br>9 | -<br>0.081 | 0.53<br>4      |
| hyperlipidaemia_0     | 16439<br>(79.075%) | 801<br>(83.962%) | -                                    | -              | -     | -          | -         | -          | -              |



|                   |                        |                      |                                      |                |       |            |           |            |                |
|-------------------|------------------------|----------------------|--------------------------------------|----------------|-------|------------|-----------|------------|----------------|
| hyperlipidaemia_1 | 4350<br>(20.925<br>%)  | 153<br>(16.038<br>%) | 0.825 (0.646-<br>1.052 ,p=0.12<br>1) | -<br>0.19<br>3 | 0.124 | -<br>1.552 | 0.12<br>1 | -<br>0.437 | 0.05<br>1      |
| fatty_liver_0     | 16655<br>(80.114<br>%) | 812<br>(85.115<br>%) | -                                    | -              | -     | -          | -         | -          | -              |
| fatty_liver_1     | 4134<br>(19.886<br>%)  | 142<br>(14.885<br>%) | 0.759 (0.59-<br>0.978 ,p=0.03<br>3)  | -<br>0.27<br>5 | 0.129 | -<br>2.135 | 0.03<br>3 | -<br>0.528 | -<br>0.02<br>3 |

Table 3. Multivariable logistic regression results

| Model | AUC           | Accuracy      | Sensitivity/Recall | Specificity   | F1-score      | PPV/precision |
|-------|---------------|---------------|--------------------|---------------|---------------|---------------|
| LR    | 0.967   0.973 | 0.928   0.927 | 0.920   0.929      | 0.928   0.927 | 0.530   0.524 | 0.373   0.365 |
| NB    | 0.903   0.909 | 0.938   0.936 | 0.634   0.662      | 0.952   0.949 | 0.474   0.472 | 0.378   0.367 |
| DT    | 0.997   0.906 | 0.993   0.970 | 1.000   0.836      | 0.993   0.976 | 0.930   0.706 | 0.870   0.610 |
| GB    | 0.998   0.992 | 0.987   0.980 | 0.976   0.900      | 0.988   0.983 | 0.871   0.794 | 0.786   0.711 |
| RF    | 1.000   0.996 | 0.997   0.989 | 1.000   0.883      | 0.997   0.994 | 0.967   0.873 | 0.936   0.864 |
| MLP   | 0.996   0.984 | 0.977   0.972 | 0.975   0.932      | 0.977   0.974 | 0.790   0.744 | 0.664   0.619 |
| XGB   | 1.000   0.996 | 0.996   0.988 | 1.000   0.897      | 0.996   0.992 | 0.961   0.867 | 0.926   0.840 |
| LGBM  | 1.000   0.996 | 0.997   0.989 | 1.000   0.886      | 0.997   0.993 | 0.970   0.869 | 0.941   0.853 |
| KNN   | 0.997   0.955 | 0.965   0.955 | 0.999   0.890      | 0.964   0.958 | 0.717   0.631 | 0.560   0.489 |

Table 4. The AUC, Accuracy, Sensitivity, Specificity, F1-score, positive predictive value (PPV) and negative predictive value (NPV) of ML models of train|test groups
